# Supplementary material for: Metabolic labelling of cholesteryl glucosides in Helicobacter pylori reveals how the uptake of human lipids enhances bacterial virulence
Source: Royal Society of Chemistry journal article supplement (doi:10.1039/c6sc00889e), 2016-01-01
Supplement: c6sc00889e1.zip [file c6sc00889e1.zip]

## **Supplementary Information**

### **Metabolic labeling of cholesteryl glucosides in *Helicobacter pylori* reveals how uptake of human lipids enhances bacterial virulence**

\*Corresponding author: Chun-Hung Lin, Institute of Biological Chemistry, Academia

Sinica, No. 128 Academia Road Section 2, Nan-Kang, Taipei, 11529, Taiwan, Tel:

886-933877327, E-mail: [chunhung@gate.sinica.edu.tw](mailto:chunhung@gate.sinica.edu.tw)

## Contents

|                                                                    |              |
|--------------------------------------------------------------------|--------------|
| <b>General reagents and instruments of chemical synthesis.....</b> | <b>3</b>     |
| <b>Supplementary schemes and synthetic procedures.....</b>         | <b>4-9</b>   |
| <b>Supplementary spectra data.....</b>                             | <b>10-16</b> |
| <b>Supplementary methods.....</b>                                  | <b>17-18</b> |
| <b>Supplementary figures.....</b>                                  | <b>19-38</b> |
| <b>Supplementary tables.....</b>                                   | <b>39-41</b> |
| <b>Supplementary movies.....</b>                                   | <b>42</b>    |
| <b>Reference.....</b>                                              | <b>43</b>    |

## General reagents and instruments of chemical synthesis

All chemicals were purchased from Acros, Fluka, Sigma or Alfa Aesar, and were used without further purification unless specified. All reactions were performed under a nitrogen atmosphere in oven-dried glassware unless indicated. Anhydrous solvents were prepared as follows: Tetrahydrofuran (THF), Ethanol (EtOH) and *N,N*-Dimethylformamide (DMF) were predried by freshly activated 4 Å Molecular Sieves and used directly. Reaction products were purified by column chromatography with Merck silica 60 (230-400 mesh). Thin layer chromatography (TLC) was used to monitor all reaction progresses by Merck silica gel 60 F<sub>254</sub> analytical plates. Compounds were first measured by UV lamp and visualized by staining reagents that contained phosphomolybdic acid hydrate.

NMR spectra were recorded routinely by a Bruker AV-400 (400 MHz), AVII-500 (500 MHz), AVANCE III 600 (600 MHz), or AVANCE III 850 (850 MHz) spectrometer using tetramethylsilane ( $\delta_{\text{H}}$  0.00), CDCl<sub>3</sub> ( $\delta_{\text{H}}$  7.26) or CD<sub>3</sub>OD [ $\delta_{\text{H}}$  3.31 (central line of a quintet)] as the internal standard. <sup>13</sup>C NMR spectra were recorded by a Bruker AV-400 (100 MHz), AVII-500 (125 MHz), or AVANCE III 600 (150 MHz) spectrometer with CDCl<sub>3</sub> [ $\delta_{\text{C}}$  77.2 (central line of a triplet)] as the internal standard. 2D NMR experiments (including <sup>1</sup>H-<sup>1</sup>H COSY, <sup>1</sup>H-<sup>1</sup>H TOCSY, <sup>1</sup>H-<sup>13</sup>C HMQC, and <sup>1</sup>H-<sup>13</sup>C HMBC) were acquired by a Bruker AVII-500 or AVANCE III 600 spectrometer. High resolution mass spectra were obtained by Bruker Bio-TOF III (ESI-TOF) or Bruker Ultraflex (MALDI-TOF/TOF) and were reported as mass/charge (*m/z*) with percentage of relative abundance. Optical rotations were measured at 589 nm (sodium D-line) at 25 °C with the PerkinElmer Model 341 Polarimeter. Specific rotations were reported as  $[\alpha]_{\text{D}}^{25}$  after dividing the observed values by the sample concentration (*C*, in g·mL<sup>-1</sup>) and the path length (*l*, in dm).

## Supplementary scheme 1

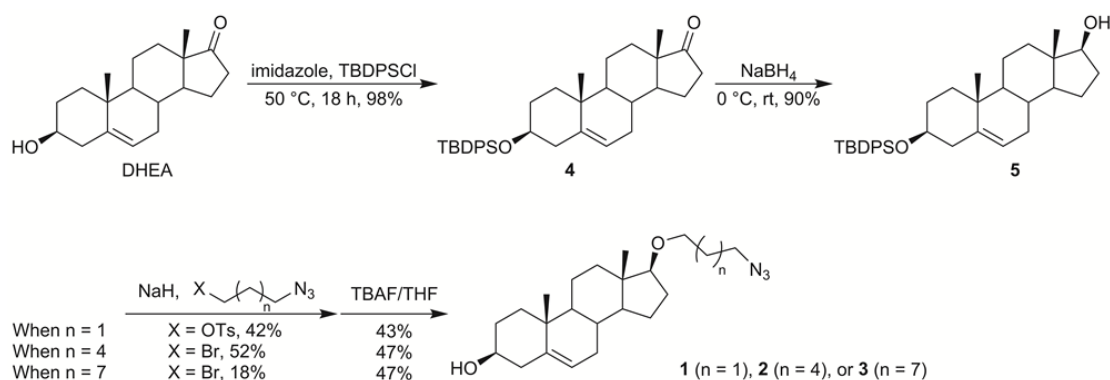

Three different azide-containing cholesterol analogues, 17 $\beta$ -([3''-azidopropoxy]-5-androsten-3 $\beta$ -ol (**1**), 17 $\beta$ -([6''-azidohexanoxo]-5-androsten-3 $\beta$ -ol (**2**) and 17 $\beta$ -([9''-azidononanoxyl]-5-androsten-3 $\beta$ -ol (**3**), were synthesized from dehydroepiandrosterone (DHEA). The only difference among the three products is the substituent length at O17. Detailed synthetic procedures were described as follows.

### 3 $\beta$ -(*tert*-Butyldiphenylsilyloxy)-5-androsten-17-one (**4**)

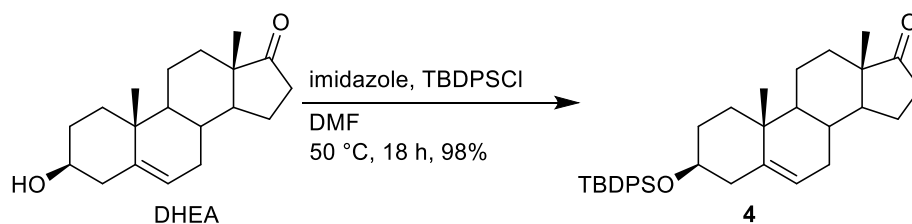

To a solution of DHEA (1.0 g, 3.46 mmol) in dry DMF (30 mL) was added imidazole (590 mg, 8.64 mmol) at 0 °C. The resulting mixture was allowed to stir at 0 °C for 15 min followed by addition of *tert*-butyldiphenylsilyl chloride (TBDPSCl) (2.2 mL, 8.64 mmol). The ice bath was removed and the reaction mixture was heated at 50 °C for 18 h. The reaction was quenched by addition of saturated aqueous NH<sub>4</sub>Cl at 0 °C, and the resulting mixture was rigorously stirred for additional 30 min at room temperature. The solvent was removed *in vacuo* to give the dried residue that was diluted with ethyl acetate. The resulting solution was washed with water and brine sequentially, dried over MgSO<sub>4</sub>, filtrated and concentrated *in vacuo* to afford the crude that was purified by recrystallization from methanol and petroleum ether (40-60 °C) to yield the desired compound **4** (1.79 g, 98%) as a white solid. TLC (ethyl acetate/hexanes = 25/75, v/v):  $R_f$  = 0.85;  $[\alpha]_D^{25}$  = 30.7 ( $c$  = 0.053, CHCl<sub>3</sub>); <sup>1</sup>H NMR (400 MHz, CDCl<sub>3</sub>)  $\delta$  7.65-7.67 (m, 4H, ArH), 7.35-7.38 (m, 6H, ArH), 5.13 (d,  $J$  = 5.0 Hz, 1H, H-6), 3.47-3.54 (m, 1H, H-3), 1.05 (s, 9H, (CH<sub>3</sub>)<sub>3</sub>C-Si), 1.00 (s, 3H, CH<sub>3</sub>), 0.88 (s, 3H, CH<sub>3</sub>); <sup>13</sup>C NMR (100 MHz, CDCl<sub>3</sub>)  $\delta$  221.4, 141.8, 135.0, 129.7, 127.9, 120.6, 73.3, 52.0, 50.4, 47.7, 42.7, 37.4, 36.8, 36.0, 32.0, 31.6, 31.0, 27.2, 26.8, 22.1, 20.5, 19.7, 19.4, 13.7; HRMS ( $m/z$ ): [M+H]<sup>+</sup> calcd. for C<sub>35</sub>H<sub>47</sub>O<sub>2</sub>Si<sup>+</sup>, 527.3340; found, 527.3328.

**3 $\beta$ -(*tert*-Butyldiphenylsilyloxy)-17 $\beta$ -hydroxy-5-androstene (5)**

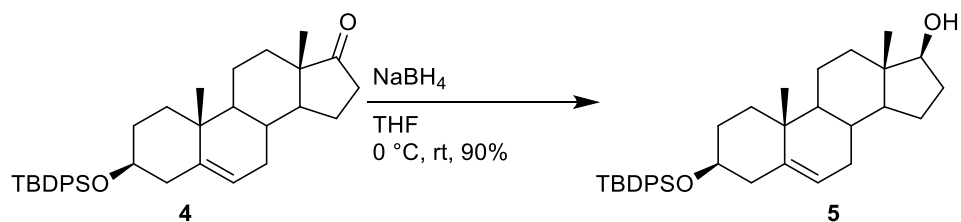

To a solution of compound **4** (1.0 g, 1.90 mmol) in methanol (28 mL) was added sodium borohydride (109 mg, 2.88 mmol) at 0 °C. The reaction mixture was stirred for an additional 30 min at room temperature. The resulting mixture was quenched by addition of water at 0 °C with rigorously stirring. The solvent was removed *in vacuo* to give dried residue that was diluted with ethyl acetate. The resulting mixture was washed with water and brine sequentially, dried over MgSO<sub>4</sub>, filtrated and concentrated *in vacuo* to afford the crude that was purified by recrystallization form methanol at room temperature to yield the desired compound **5** (903 mg, 90%) as a white solid. TLC (ethyl acetate/hexanes = 25/75, v/v):  $R_f$  = 0.5;  $[\alpha]_D^{25}$  = 39.0 ( $c$  = 0.053, CHCl<sub>3</sub>); <sup>1</sup>H NMR (400 MHz, CDCl<sub>3</sub>)  $\delta$  7.65-7.67 (m, 4H, ArH), 7.35-7.38 (m, 6H, ArH), 5.11 (d,  $J$  = 4.97 Hz, 1H, H-6), 3.57 (t,  $J$  = 9.04 Hz, 1H, H-17) 3.57-3.47 (m, 1H, H-3), 1.06 (s, 9H, (CH<sub>3</sub>)<sub>3</sub>C-Si), 0.99 (s, 3H, CH<sub>3</sub>), 0.71 (s, 3H, CH<sub>3</sub>); <sup>13</sup>C NMR (100 MHz, CDCl<sub>3</sub>)  $\delta$  141.5, 135.9, 134.9, 129.6, 127.6, 121.0, 81.9, 77.4, 73.3, 51.5, 50.3, 42.8, 42.7, 37.4, 36.7, 32.1, 31.6, 30.5, 27.2, 23.6, 20.8, 20.8, 19.6, 19.3, 11.1; HRMS ( $m/z$ ): [M+H]<sup>+</sup> calcd. for C<sub>35</sub>H<sub>49</sub>O<sub>2</sub>Si<sup>+</sup>, 529.3496; found, 529.3478. The stereochemistry of C-17 in compound **5** was determined by the NOESY spectrum shown as follows. (A) Structure of compound **5**. (B) NOESY spectrum of **5**. The arrow designates the cross-peak between H-17 and H-14.

Current Data Parameters

NAME 4-4-12-NOE89Experiment4CholesterylUnsaturated

EXPNO 1

PROCNO 1

PT - Acquisition Parameters

Date\_ 20120624

Time 12:14

INSTRUM spect

PROBHD 5 mm BBO BB-1H

PULPROG zgpg30

PCPDPRG2 waltz16

SOLVENT CDCl3

NS 8

DS 4

SW 4004.410 Hz

F2 400.136000 MHz

RG 655.500

RG2 655.500

RG3 655.500

RG4 655.500

RG5 655.500

RG6 655.500

RG7 655.500

RG8 655.500

RG9 655.500

RG10 655.500

RG11 655.500

RG12 655.500

RG13 655.500

RG14 655.500

RG15 655.500

RG16 655.500

RG17 655.500

RG18 655.500

RG19 655.500

RG20 655.500

RG21 655.500

RG22 655.500

RG23 655.500

RG24 655.500

RG25 655.500

RG26 655.500

RG27 655.500

RG28 655.500

RG29 655.500

RG30 655.500

RG31 655.500

RG32 655.500

RG33 655.500

RG34 655.500

RG35 655.500

RG36 655.500

RG37 655.500

RG38 655.500

RG39 655.500

RG40 655.500

RG41 655.500

RG42 655.500

RG43 655.500

RG44 655.500

RG45 655.500

RG46 655.500

RG47 655.500

RG48 655.500

RG49 655.500

RG50 655.500

RG51 655.500

RG52 655.500

RG53 655.500

RG54 655.500

RG55 655.500

RG56 655.500

RG57 655.500

RG58 655.500

RG59 655.500

RG60 655.500

RG61 655.500

RG62 655.500

RG63 655.500

RG64 655.500

RG65 655.500

RG66 655.500

RG67 655.500

RG68 655.500

RG69 655.500

RG70 655.500

RG71 655.500

RG72 655.500

RG73 655.500

RG74 655.500

RG75 655.500

RG76 655.500

RG77 655.500

RG78 655.500

RG79 655.500

RG80 655.500

RG81 655.500

RG82 655.500

RG83 655.500

RG84 655.500

RG85 655.500

RG86 655.500

RG87 655.500

RG88 655.500

RG89 655.500

RG90 655.500

RG91 655.500

RG92 655.500

RG93 655.500

RG94 655.500

RG95 655.500

RG96 655.500

RG97 655.500

RG98 655.500

RG99 655.500

RG100 655.500

RG101 655.500

RG102 655.500

RG103 655.500

RG104 655.500

RG105 655.500

RG106 655.500

RG107 655.500

RG108 655.500

RG109 655.500

RG110 655.500

RG111 655.500

RG112 655.500

RG113 655.500

RG114 655.500

RG115 655.500

RG116 655.500

RG117 655.500

RG118 655.500

RG119 655.500

RG120 655.500

RG121 655.500

RG122 655.500

RG123 655.500

RG124 655.500

RG125 655.500

RG126 655.500

RG127 655.500

RG128 655.500

RG129 655.500

RG130 655.500

RG131 655.500

RG132 655.500

RG133 655.500

RG134 655.500

RG135 655.500

RG136 655.500

RG137 655.500

RG138 655.500

RG139 655.500

RG140 655.500

RG141 655.500

RG142 655.500

RG143 655.500

RG144 655.500

RG145 655.500

RG146 655.500

RG147 655.500

RG148 655.500

RG149 655.500

RG150 655.500

RG151 655.500

RG152 655.500

RG153 655.500

RG154 655.500

RG155 655.500

RG156 655.500

RG157 655.500

RG158 655.500

RG159 655.500

RG160 655.500

RG161 655.500

RG162 655.500

RG163 655.500

RG164 655.500

RG165 655.500

RG166 655.500

RG167 655.500

RG168 655.500

RG169 655.500

RG170 655.500

RG171 655.500

RG172 655.500

RG173 655.500

RG174 655.500

RG175 655.500

RG176 655.500

RG177 655.500

RG178 655.500

RG179 655.500

RG180 655.500

RG181 655.500

RG182 655.500

RG183 655.500

RG184 655.500

RG185 655.500

RG186 655.500

RG187 655.500

RG188 655.500

RG189 655.500

RG190 655.500

RG191 655.500

RG192 655.500

RG193 655.500

RG194 655.500

RG195 655.500

RG196 655.500

RG197 655.500

RG198 655.500

RG199 655.500

RG200 655.500

RG201 655.500

RG202 655.500

RG203 655.500

RG204 655.500

RG205 655.500

RG206 655.500

RG207 655.500

RG208 655.500

RG209 655.500

RG210 655.500

RG211 655.500

4-methylbenzenesulfonate (1.45 g, 6.24 mmol). The reaction temperature was raised to 100 °C and the mixture was allowed to stir at 100 °C for 24 h. The reaction was cooled to room temperature and then quenched by addition of saturated aqueous NH<sub>4</sub>Cl at 0 °C with rigorously stirring. Most solvent was removed *in vacuo* to afford dried residue that was diluted with dichloromethane and the resulting mixture washed with water and brine sequentially, dried over MgSO<sub>4</sub>, filtrated and concentrated *in vacuo* to afford the crude that was purified by silica gel column chromatography with ether/petroleum ether (2/8, v/v) to afford the pure TBDPS-protected product. TLC (ethyl acetate/hexanes = 15/85, v/v):  $R_f$  = 0.65; The product (588.6 mg, 0.79 mmol) was then dissolved in anhydrous THF (15 mL) and treated with a solution of (*n*-Bu)<sub>4</sub>NF (1.0 M solution in THF, 7.9 mL, 7.9 mmol) at room temperature, and the resulting mixture was stirred for 16 h. The reaction was quenched with saturated aqueous NH<sub>4</sub>Cl. The solvent was removed *in vacuo* to afford the dried residue that was diluted with ethyl acetate and the resulting mixture was washed with water and brine sequentially, dried over MgSO<sub>4</sub>, filtrated and concentrated *in vacuo* to afford the crude that was purified by flash column chromatography with dichloromethane/ethyl acetate (9/1, v/v) to afford pure

7

### 17 $\beta$ -(6'-azidohexanoxyl)-5-androsten-3 $\beta$ -ol (**2**)

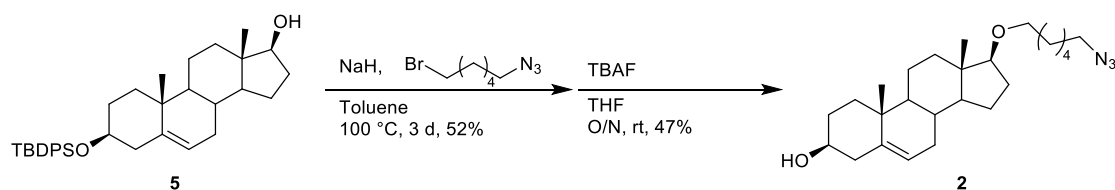

The preparation of **2** took two steps starting from **5** (24% total yield), which is similar to that of **1**. TLC of **2** (ethyl acetate/hexanes = 15/85, v/v):  $R_f$  = 0.20;  $[\alpha]_D^{25}$  =  $-79.5$  ( $c$  = 0.042,  $\text{CHCl}_3$ );  $^1\text{H}$  NMR (500 MHz,  $\text{CDCl}_3$ )  $\delta$  5.34 (d,  $J$  = 5.2 Hz, 1H, H-6), 3.51 (m, 1H, H-3), 3.48-3.38 (m, 2H, H-20a,b), 3.28 (t,  $J$  = 8.4 Hz, 1H, H-17), 3.26 (t,  $J$  = 6.7 Hz, 2H, H-25a,b), 2.31-2.20 (m, 2H, H-4a + H-4b), 2.02-1.95 (m, 2H, H-16a + H-7a), 1.94-1.89 (m, 1H, H-12a), 1.87-1.80 (m, 3H, H-11a + H-15a + H-2a), 1.64-1.43 (m, 10H, H-21a,b + H-24a,b + H-1a + H-2b + H-8 + H-16b + H-11b + H-7b), 1.40-1.34 (m, 4H, H-22a,b + H-23a,b), 1.26 (m, 1H, H-15b), 1.07 (m, 1H, H-12b), 1.01 (s, 3H,  $\text{C}19\text{H}_3$ ), 0.98-0.88 (m, 3H, H-14 + H-1b + H-9), 0.77 (s, 3H,  $\text{C}18\text{H}_3$ );  $^{13}\text{C}$  NMR (100 MHz,  $\text{CDCl}_3$ )  $\delta$  141.0, 121.5, 89.2, 71.8, 70.1, 51.8, 51.6, 50.4, 43.0, 42.4, 38.1, 37.5, 36.7, 31.9, 31.8, 31.7, 30.7, 29.9, 29.0, 28.3, 26.7, 26.0, 23.6, 20.9, 19.6, 11.7; HRMS ( $m/z$ ):  $[\text{M}+\text{H}]^+$  calcd. for  $\text{C}_{25}\text{H}_{42}\text{N}_3\text{O}_2^+$ , 416.3272; found, 416.3265

### 17 $\beta$ -(9'-azidononanoxyl)-5-androsten-3 $\beta$ -ol (**3**)

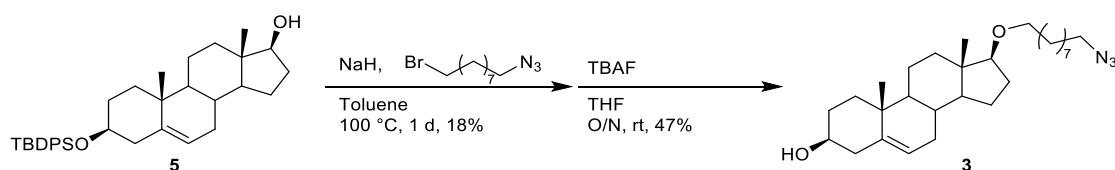

The preparation of **3** took two steps starting from **5** (8% total yield), which is similar to that of **1**. TLC of **3** (ethyl acetate/hexanes = 15/85, v/v):  $R_f$  = 0.20;  $[\alpha]_D^{25}$  =  $-85.5$  ( $c$  = 0.046,  $\text{CHCl}_3$ );  $^1\text{H}$  NMR (500 MHz,  $\text{CDCl}_3$ )  $\delta$  5.35 (d,  $J$  = 5.2 Hz, 1H, H-6), 3.52 (m, 1H, H-3), 3.48-3.38 (m, 2H, H-20a,b), 3.28 (t,  $J$  = 8.4 Hz, 1H, H-17), 3.26 (t,  $J$  = 7.3 Hz, 2H, H-28a,b), 2.32-2.20 (m, 2H, H-4a + H-4b), 2.04-1.96 (m, 2H, H-16a + H-7a), 1.94-1.90 (m, 1H, H-12a), 1.87-1.80 (m, 3H, H-11a + H-15a + H-2a), 1.64-1.43 (m, 10H, H-21a,b + H-27a,b + H-1a + H-2b + H-8 + H-16b + H-11b + H-7b), 1.38-1.22 (m, 11H, H-22a,b + H-23a,b + H-24a,b + H-25a,b + H-26a,b + H-15b), 1.08 (m, 1H, H-12b), 1.02 (s, 3H,  $\text{C}19\text{H}_3$ ), 0.99-0.87 (m, 3H, H-14 + H-1b + H-9), 0.77 (s, 3H,  $\text{C}18\text{H}_3$ );  $^{13}\text{C}$  NMR (100 MHz,  $\text{CDCl}_3$ )  $\delta$  141.1, 121.7, 89.3, 72.0, 70.4, 51.9, 51.7, 50.5, 43.0, 42.5, 38.2, 37.5, 36.8, 32.0, 32.0, 31.7, 30.4, 29.6, 29.6, 29.3, 29.1, 28.4, 26.9, 26.4, 23.6, 21.0, 19.6, 11.7; HRMS ( $m/z$ ):  $[\text{M}+\text{H}]^+$  calcd. for  $\text{C}_{28}\text{H}_{48}\text{N}_3\text{O}_2^+$ , 458.3741; found, 458.3730



## Supplementary scheme 2

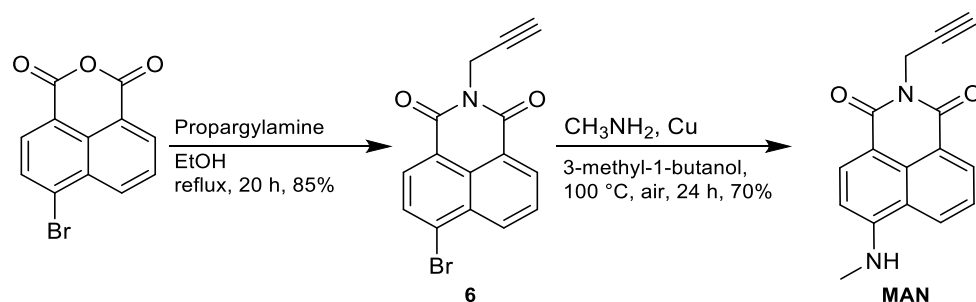

### 4-N-methylamino-1,8-naphthalimidopropyne (MAN)

To a solution of 4-bromo-1,8-naphthalic anhydride (1.0 g, 3.61 mmol) in anhydrous ethanol (200 mL) was added propargylamine (0.24 g, 4.33 mmol) at room temperature. The reaction mixture was heated under a reflux condition for 20 h and then cooled down to room temperature. After filtration to remove insoluble precipitates, the filtrate was concentrated *in vacuo* to afford the crude that was purified by flash column chromatography with ethyl acetate/hexanes (in a gradient elution) to afford compound **6** as a white solid. The intermediate **6** (0.96 g, 3.07 mmol) and a catalytic amount of copper powder (9.8 mg, 0.15 mmol) was added to the mixture of 30% aqueous methylamine solution (1.66 mL, 15.35 mmol) and 3-methyl-1-butanol (10 mL) in a 30 mL screwed tube at room temperature. The resulting mixture was immersed into the oil bath heated at 100 °C. After the reaction was completed, the reaction mixture was cooled down to room temperature and most of the solvent was removed *in vacuo*. The crude was diluted with ethyl acetate (20 mL) and the resulting mixture was washed with water and brine sequentially, dried over  $\text{MgSO}_4$ , filtrated and concentrated *in vacuo* to afford the dried residue that was purified by flash column chromatography with petroleum ether/ethyl acetate (in a gradient elution) to give the desired compound MAN (0.57 g, 60% in two steps). TLC (ethyl acetate/hexanes = 25/75, v/v):  $R_f$  = 0.30;  $[\alpha]_D^{25}$  = 5.0 ( $c$  = 0.053, DMF);  $^1\text{H}$  NMR (500 MHz,  $\text{CDCl}_3$ )  $\delta$  8.63 (d,  $J$  = 7.3 Hz, 1H, Ar-*H*), 8.54 (d,  $J$  = 8.3 Hz, 1H, Ar-*H*), 8.09 (dd,  $J$  = 8.3 Hz, 1H, Ar-*H*), 7.64 (t,  $J$  = 8.3 Hz, 1H, Ar-*H*), 6.73 (d,  $J$  = 8.3 Hz, 1H, Ar-*H*), 5.42 (m, 1H, NH- $\text{CH}_3$ ), 4.95 (m, 2H, N- $\text{CH}_2$ -CCH), 3.16 (d,  $J$  = 5.2 Hz, 3H, NH- $\text{CH}_3$ ), 2.17 (m, 1H, N- $\text{CH}_2$ -CCH);  $^{13}\text{C}$  NMR (100 MHz,  $\text{CDCl}_3$ )  $\delta$  164.7, 164.1, 151.7, 135.3, 131.5, 130.0, 127.7, 124.5, 122.1, 120.4, 108.3, 103.7, 78.0, 70.3, 35.2, 30.0. HRMS ( $m/z$ ):  $[\text{M}+\text{H}]^+$  calcd. for  $\text{C}_{16}\text{H}_{13}\text{N}_2\text{O}_2^+$ , 265.0972; found, 265.0965

## Supplementary spectra data 1

### Assignment of $^1\text{H}$ and $^{13}\text{C}$ NMR spectra of fluorophore-labeled CPG

#### CPG(14:0/19c:0)

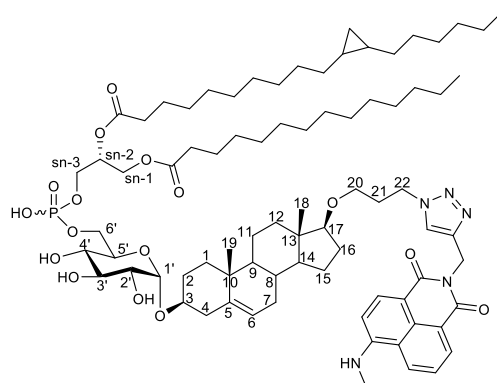

**$^1\text{H}$  NMR** (600 MHz,  $\text{CDCl}_3/\text{CD}_3\text{OD}$ )  $\delta$  8.40 (d,  $J = 7.3$  Hz, 1H, Ar-*H*), 8.30 (d,  $J = 8.5$  Hz, 1H, Ar-*H*), 8.16 (d,  $J = 8.3$  Hz, 1H, Ar-*H*), 7.50 (s, 1H, *H*-triazole), 7.42 (t,  $J = 7.7$  Hz, 1H, Ar-*H*), 6.50 (d,  $J = 8.6$  Hz, 1H, Ar-*H*), 5.38 (d,  $J = 14.8$  Hz, 1H,  $\text{CCH}_2\text{N}$ ), 5.31 (d,  $J = 14.8$  Hz, 1H,  $\text{CCH}_2\text{N}$ ), 5.19 (s, 1H, *H*-6), 5.12 (m, 1H, *sn*-2-*CH*), 4.88 (d,  $J = 4.1$  Hz, 1H, *H*-1'), 4.30 (dd,  $J = 6.6$  Hz, 7.1 Hz, 2H, *H*-22a,b), 4.27 (dd,  $J = 2.5$  Hz, 11.8 Hz, 1H, *sn*-1- $\text{CH}_{2a}$  glycerol), 4.18 (t,  $J = 11.0$  Hz, 1H, *H*-6'a), 4.04 (dd,  $J = 6.6$  Hz, 11.8 Hz, 1H, *sn*-1- $\text{CH}_{2b}$  glycerol), 3.86 (m, 2H, *sn*-3- $\text{CH}_{2a}$  glycerol + *sn*-3- $\text{CH}_{2b}$  glycerol), 3.80 (t,  $J = 11.0$  Hz, 1H, *H*-6'b), 3.61 (dd,  $J = 9.1$ , 9.7 Hz, 1H, *H*-3'), 3.55 (m, 1H, *H*-5'), 3.48 (dd,  $J = 9.7$ , 9.4 Hz, 1H, *H*-4'), 3.37 (dd,  $J = 4.1$ , 9.1 Hz, 1H, *H*-2'), 3.33 (m, 1H, *H*-3), 3.18 (m, 1H, *H*-20a), 3.13 (m, 1H, *H*-20b), 3.00-2.90 (m, 3H, *H*-17 +  $\text{NHCH}_3$ ), 2.21-2.17 (m, 5H, *H*-4,  $\text{COCH}_2\text{C}_{12}\text{H}_{25}$ ,  $\text{COCH}_2\text{C}_{17}\text{H}_{33}$ ), 1.97-1.93 (m, 2H, *H*-21a,b), 1.84-0.55 (m, 74H,  $\text{COCH}_2\text{C}_{12}\text{H}_{25}$  +  $\text{COCH}_2\text{C}_8\text{H}_{16}$ - $\text{C}_3\text{H}_4$ - $\text{C}_6\text{H}_{13}$  + *H*-1a,b, *H*-2a,b, *H*-7a,b, *H*-8, *H*-9, *H*-11a,b, *H*-12a,b, *H*-14, *H*-15a,b, *H*-16a,b,  $\text{CH}_3$ -18), 0.54-0.50 (m, 5H, cyclopropyl 2 $\times$ *CH* +  $\text{CH}_3$ -19), 0.43 (ddd,  $J = 8.3$ , 8.3, 4.1 Hz, 1H, cyclopropyl  $\text{CH}_{2a}$ ), -0.46 (ddd,  $J = 5.1$ , 5.1, 4.1 Hz, 1H, cyclopropyl  $\text{CH}_{2b}$ );  **$^{13}\text{C}$  NMR** (150 MHz,  $\text{CDCl}_3$ )  $\delta$  174.0 ( $\text{COCH}_2\text{C}_{12}\text{H}_{25}$ ), 173.6 ( $\text{COCH}_2\text{C}_{17}\text{H}_{33}$ ), 164.7, 164.1, 151.7, 144.0, 140.4 (*C*-5), 135.3, 131.5, 130.0, 127.7, 124.5, 124.0, 122.1, 121.8 (*C*-6), 120.4, 108.3, 103.7, 97.2 (*C*-1'), 89.2 (*C*-17), 77.9 (*C*-3), 72.8 (*C*-3'), 71.9 (*C*-2'), 71.2 (*C*-5'), 70.2 (*sn*-2- $\text{CH}_2$ ), 68.6 (*C*-4'), 65.3, 64.1 (*C*-6'), 63.6 (*sn*-3- $\text{CH}_2$ ), 62.6 (*sn*-1- $\text{CH}_2$ ), 51.1, 49.8, 47.2, 42.6, 40.0, 37.5, 36.9, 36.6, 35.2, 34.3, 34.1, 33.6, 32.0, 32.0, 31.5, 31.3, 30.3, 30.2, 30.0, 29.7, 29.7, 29.7, 29.7, 29.7, 29.7, 29.6, 29.6, 29.6, 29.6, 29.4, 29.4, 29.4, 29.4, 29.2, 29.2, 28.7, 28.7, 28.7, 24.9, 24.9, 23.2, 22.7, 19.3, 15.7 (Cyclopropyl  $\text{CH}$ ), 15.7 (Cyclopropyl  $\text{CH}$ ), 14.2, 14.2, 11.4, 10.9 (Cyclopropyl  $\text{CH}_2$ );  **$^{31}\text{P}$  NMR** (200 MHz,  $\text{C}_3\text{D}_8\text{O}/\text{D}_2\text{O}/\text{H}_2\text{O}$  1/0.83/0.67)  $\delta$  -0.0073.

## Supplementary spectra data 2

### Assignment of $^1\text{H}$ and $^{13}\text{C}$ NMR spectra of fluorophore-labeled CAG

#### CAG(14:0)

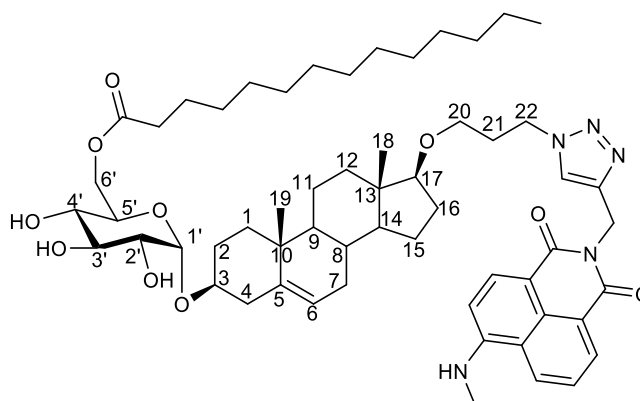

$^1\text{H}$  NMR (500 MHz,  $\text{CDCl}_3$ )  $\delta$  8.46 (d,  $J = 7.1$  Hz, 1H, Ar- $H$ ), 8.42 (d,  $J = 8.4$  Hz, 1H, Ar- $H$ ), 7.97 (d,  $J = 8.1$  Hz, 1H, Ar- $H$ ), 7.60 (s, 1H,  $H$ -triazole), 7.44 (t,  $J = 7.5$  Hz, 1H, Ar- $H$ ), 6.62 (d,  $J = 8.4$  Hz, 1H, Ar- $H$ ), 5.75 (q,  $J = 6.6$  Hz, 4.2 Hz, 1H,  $\text{NHCH}_3$ ), 5.49 (d,  $J = 14.5$  Hz, 1H,  $\text{CCH}_2\text{N}$ ), 5.45 (d,  $J = 14.5$  Hz, 1H,  $\text{CCH}_2\text{N}$ ), 5.32 (d,  $J = 5.0$  Hz, 1H,  $H$ -6), 5.01 (d,  $J = 4.2$  Hz, 1H,  $H$ -1'), 4.51 (dd,  $J = 12.3$  Hz, 4.7 Hz, 1H,  $H$ -22a), 4.41-4.38 (m,  $J = 6.8$  Hz, 2H,  $H$ -6a' +  $H$ -6'b), 4.22 (dd,  $J = 12.3$  Hz, 2.6 Hz, 1H,  $H$ -22b), 3.84 (ddd,  $J = 9.8, 6.8, 2.1$  Hz, 1H,  $H$ -5'), 3.72-3.69 (m,  $J = 10.3, 9.3$  Hz, 1H,  $H$ -3'), 3.50-3.44 (m,  $J = 4.2, 10.3$  Hz, 2H,  $H$ -2' +  $H$ -3), 3.38-3.28 (m,  $J = 9.3, 9.8$  Hz, 3H,  $H$ -4' +  $H$ -20a,b), 3.16 (t,  $J = 8.3$  Hz, 1H,  $H$ -17), 3.09 (m, 3H,  $\text{NHCH}_3$ ), 2.36-2.33 (m, 3H,  $H$ -4,  $\text{COCH}_2\text{C}_{12}\text{H}_{25}$ ), 2.09-2.04 (m, 2H,  $H$ -21a,b), 1.84-0.55 (m, 45H,  $\text{COCH}_2\text{C}_{12}\text{H}_{25}$  +  $H$ -1a,b,  $H$ -2a,b,  $H$ -7a,b,  $H$ -8,  $H$ -9,  $H$ -11a,b,  $H$ -12a,b,  $H$ -14,  $H$ -15a,b,  $H$ -16a,b,  $\text{CH}_3$ -18), 0.68 (s, 3H,  $\text{CH}_3$ -19);  $^{13}\text{C}$  NMR (150 MHz,  $\text{CDCl}_3$ )  $\delta$  174.7 ( $\text{COCH}_2\text{C}_{12}\text{H}_{25}$ ), 164.7, 164.1, 151.4, 144.1, 140.6 ( $C$ -5), 135.1, 131.3, 129.7, 127.2, 124.5, 123.9, 122.2, 121.9 ( $C$ -6), 120.1, 108.8, 103.8, 97.2 ( $C$ -1'), 89.3 ( $C$ -17), 78.4 ( $C$ -3), 74.1 ( $C$ -3'), 71.9 ( $C$ -2'), 70.2 ( $C$ -4'), 70.0 ( $C$ -5'), 65.7, 63.6 ( $C$ -6'), 51.3, 50.1, 47.5, 42.8, 40.2, 37.7, 37.1, 36.7, 35.1, 34.4, 33.5, 32.1, 31.6, 31.5, 30.6, 30.3, 30.2, 29.9, 29.8, 29.8, 29.8, 29.5, 29.5, 29.5, 29.4, 29.4, 25.0, 22.9, 20.6, 19.4, 14.3, 11.6.

### Supplementary spectra data 3

#### Determination of the structures of cholesteryl glucoside derivatives by a series of NMR

**experiments.** CPG(14:0/19c:0) was used as a representative example to explain how we determined the structures of cholesteryl glucoside derivatives by a series of NMR experiments. The data and the corresponding assignments were in consistence with those reported by Gervay-Hague and coworkers <sup>1</sup>.

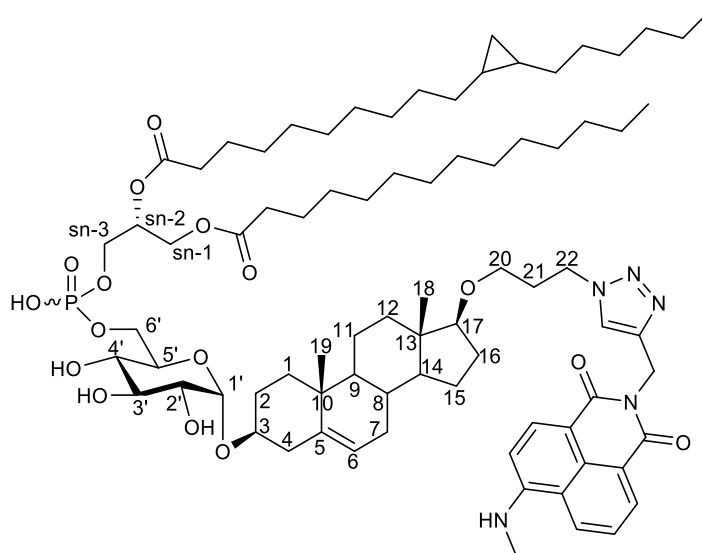

CPG(14:0/19c:0)

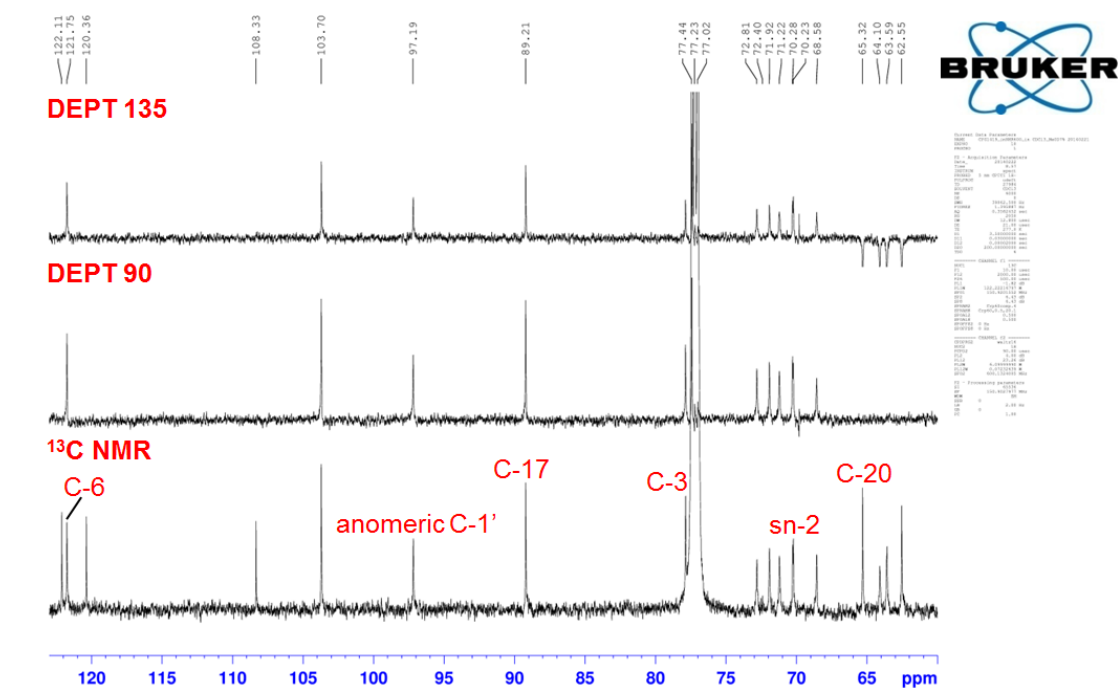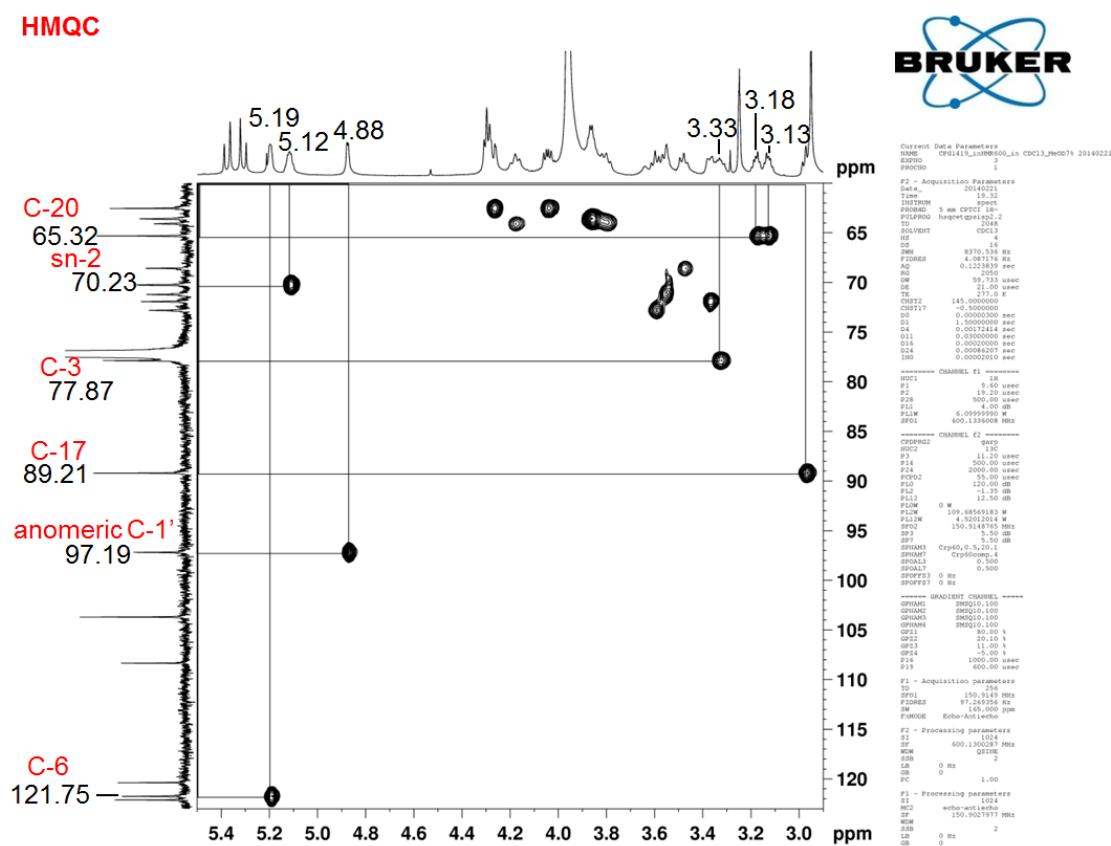

B. To correlate the H-1'/C-1' with the C-3/H-3. To correlate the H-17/C-17 with the indicated carbon/protons of linker.

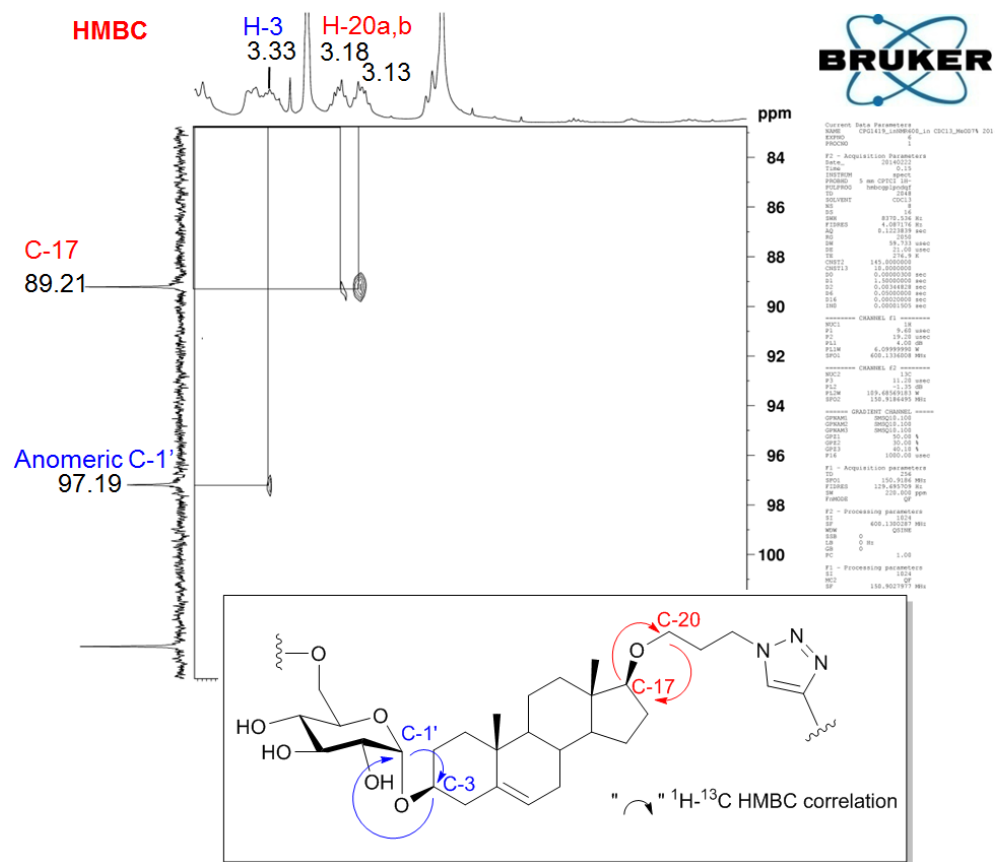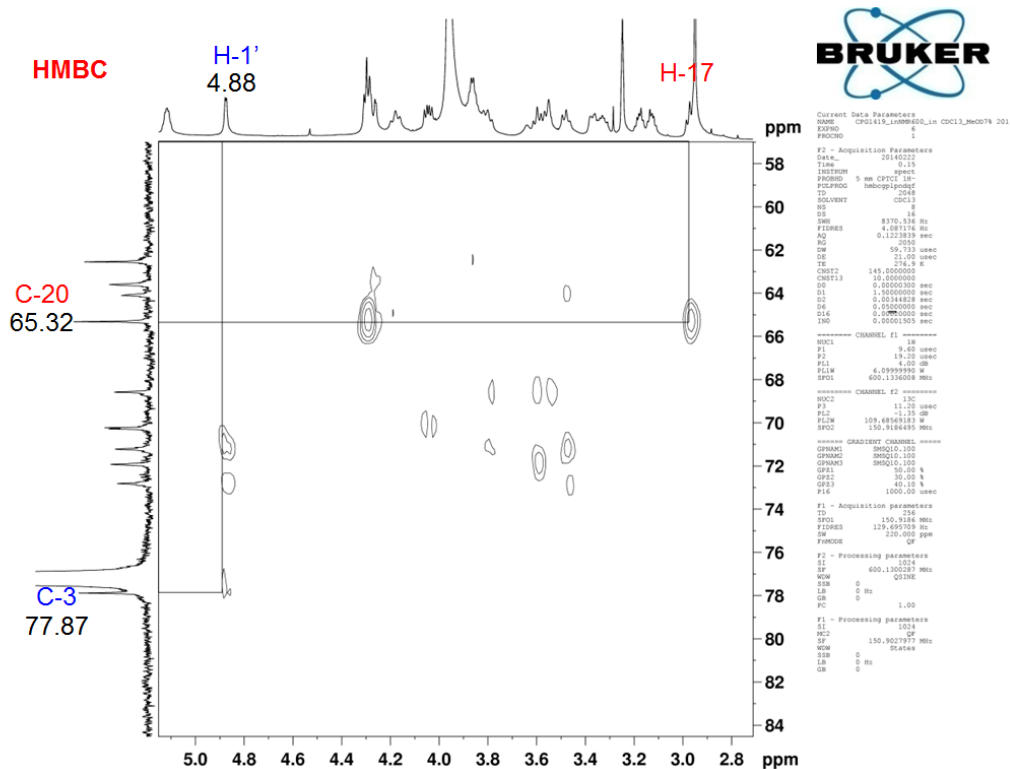

C. To identify the protons/carbons of glucose moiety and those of the linker by 2D-COSY

COSY

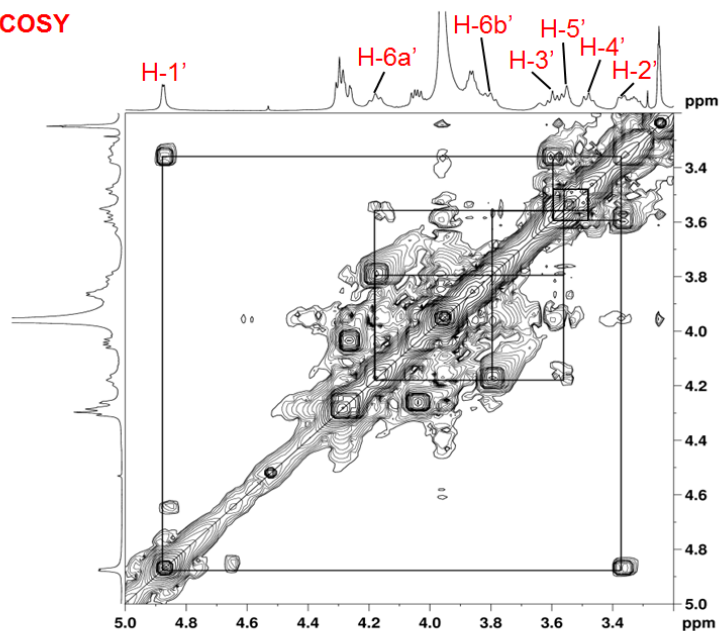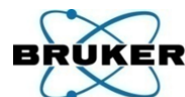

```
Current Data Parameters
NAME: CPD419_LANDR600_in CDC13_M0074 201
EXPNO: 2
PROCNO: 1
F2 - Acquisition Parameters
Date_: 20140221
Time: 15.53
INSTRUM: spect
PROBHD: 5 mm CPYC-1H
PULPROG: zgpg30
TD: 65536
SOLVENT: CDCl3
NS: 4
DS: 16
SWH: 8370.556 Hz
FIDRES: 0.001716 Hz
AQ: 0.1223839 sec
RG: 512
DM: 59.713 usec
DE: 2.11 usec
TE: 300.2 K
D0: 0.0000300 sec
D1: 1.0000000 sec
D11: 0.0000000 sec
D12: 0.0000000 sec
D13: 0.0000000 sec
D14: 0.0000000 sec
D15: 0.0001920 sec
SFO: 400.1360000 MHz
===== CHANNEL f1 =====
NUC1: 1H
P1: 9.40 usec
PC1: 2500.00 usec
PL1: 0.00 dB
PL12: 2.11 dB
PL10W: 6.8994804 W
PL10W: 0.8994804 W
SFO1: 400.1360000 MHz
===== GRADIENT CHANNEL =====
GPM1: SFO110.00 %
GPR1: 1000.00 usec
P14: 0
F1 - Acquisition parameters
TD: 65536
SFO1: 400.1360000 MHz
FIDRES: 0.001716 Hz
RG: 512
DM: 59.713 usec
DE: 2.11 usec
TE: 300.2 K
D0: 0.0000300 sec
D1: 1.0000000 sec
D11: 0.0000000 sec
D12: 0.0000000 sec
D13: 0.0000000 sec
D14: 0.0000000 sec
D15: 0.0001920 sec
SFO: 400.1360000 MHz
===== CHANNEL f2 =====
NUC2: 1H
P2: 9.40 usec
PC2: 2500.00 usec
PL2: 0.00 dB
PL22: 2.11 dB
PL20W: 6.8994804 W
PL20W: 0.8994804 W
SFO2: 400.1360000 MHz
===== GRADIENT CHANNEL =====
GPM2: SFO210.00 %
GPR2: 1000.00 usec
P16: 0
F2 - Processing parameters
SI: 32768
SF: 400.1360000 MHz
WDW: EM
SSB: 0
GB: 0
PC: 1.00
F1 - Processing parameters
SI: 32768
SF: 400.1360000 MHz
WDW: EM
SSB: 0
GB: 0
PC: 1.00
```

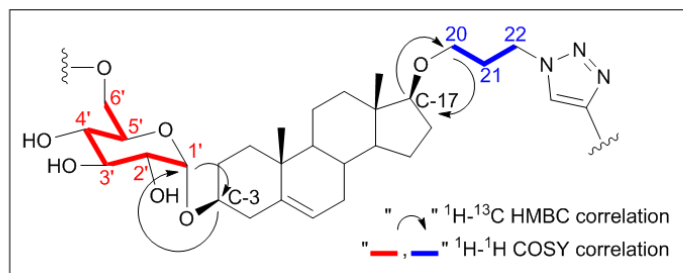

COSY

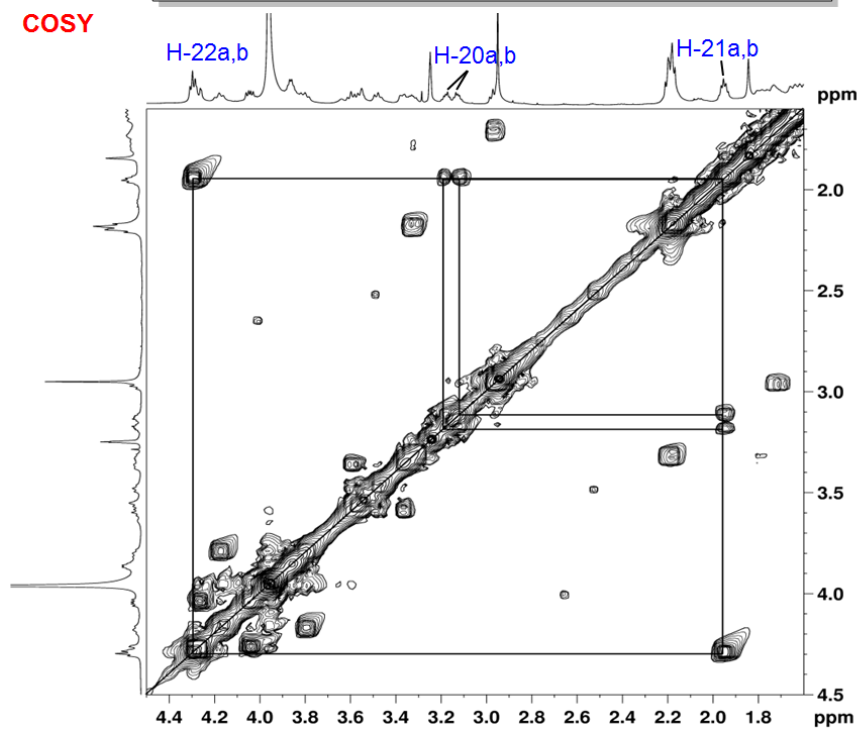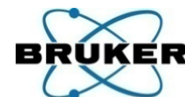

```
Current Data Parameters
NAME: CPD419_LANDR600_in CDC13_M0074 20140221
EXPNO: 2
PROCNO: 1
F2 - Acquisition Parameters
Date_: 20140221
Time: 15.53
INSTRUM: spect
PROBHD: 5 mm CPYC-1H
PULPROG: zgpg30
TD: 65536
SOLVENT: CDCl3
NS: 4
DS: 16
SWH: 8370.556 Hz
FIDRES: 0.001716 Hz
AQ: 0.1223839 sec
RG: 512
DM: 59.713 usec
DE: 2.11 usec
TE: 300.2 K
D0: 0.0000300 sec
D1: 1.0000000 sec
D11: 0.0000000 sec
D12: 0.0000000 sec
D13: 0.0000000 sec
D14: 0.0000000 sec
D15: 0.0001920 sec
SFO: 400.1360000 MHz
===== CHANNEL f1 =====
NUC1: 1H
P1: 9.40 usec
PC1: 2500.00 usec
PL1: 0.00 dB
PL12: 2.11 dB
PL10W: 6.8994804 W
PL10W: 0.8994804 W
SFO1: 400.1360000 MHz
===== GRADIENT CHANNEL =====
GPM1: SFO110.00 %
GPR1: 1000.00 usec
P14: 0
F1 - Acquisition parameters
TD: 65536
SFO1: 400.1360000 MHz
FIDRES: 0.001716 Hz
RG: 512
DM: 59.713 usec
DE: 2.11 usec
TE: 300.2 K
D0: 0.0000300 sec
D1: 1.0000000 sec
D11: 0.0000000 sec
D12: 0.0000000 sec
D13: 0.0000000 sec
D14: 0.0000000 sec
D15: 0.0001920 sec
SFO: 400.1360000 MHz
===== CHANNEL f2 =====
NUC2: 1H
P2: 9.40 usec
PC2: 2500.00 usec
PL2: 0.00 dB
PL22: 2.11 dB
PL20W: 6.8994804 W
PL20W: 0.8994804 W
SFO2: 400.1360000 MHz
===== GRADIENT CHANNEL =====
GPM2: SFO210.00 %
GPR2: 1000.00 usec
P16: 0
F2 - Processing parameters
SI: 32768
SF: 400.1360000 MHz
WDW: EM
SSB: 0
GB: 0
PC: 1.00
F1 - Processing parameters
SI: 32768
SF: 400.1360000 MHz
WDW: EM
SSB: 0
GB: 0
PC: 1.00
```

**HMBC**

**BRUKER**

sn-1a

fa14

ppm

168

170

172

174

176

5

fa14

sn-1a

sn-2

fa19

" " :  $^1\text{H}$ - $^{13}\text{C}$  HMBC correlation

" — " :  $^1\text{H}$ - $^1\text{H}$  COSY correlation

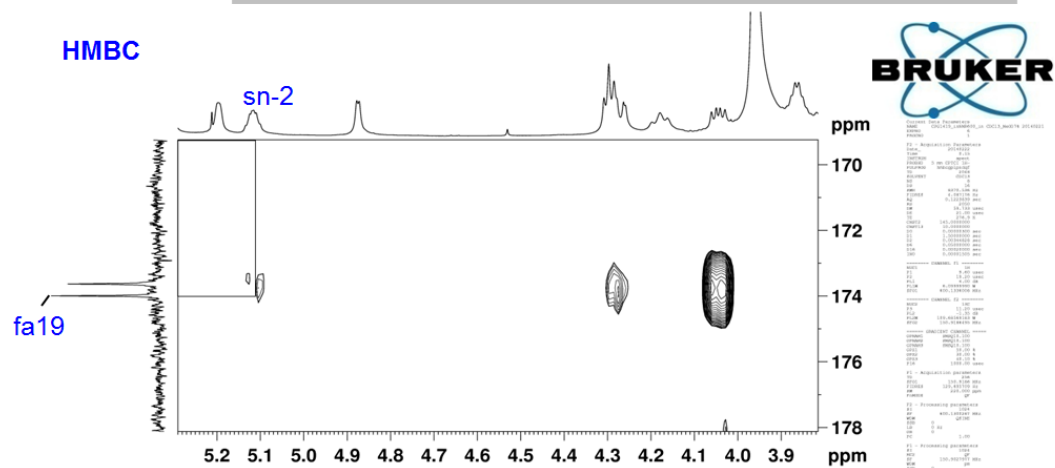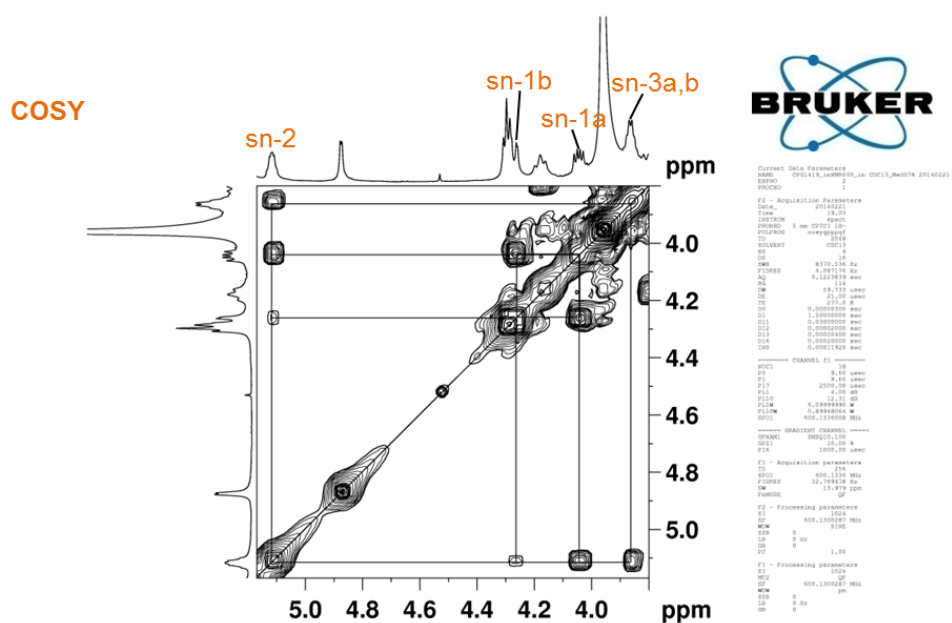



## Supplementary methods

### *H. pylori* strains and bacterial culture

The standard *H. pylori* strain 26695 (ATCC 700392) was obtained from the Bioresource Collection and Research Center, Hsinchu, Taiwan. Clinically isolated strains were obtained during endoscopic examination at National Taiwan University Hospital, Taiwan. The  $\Delta$ CGT strain was constructed by insertion of the chloramphenicol resistance cassette into the cholesterol glucosyltransferase gene (*hp0421*) via homologous recombination.<sup>2</sup> *H. pylori* strains were cultured on Brucella agar plates (Becton Dickinson) supplemented with 5% sheep blood for 2–4 days at 37 °C under microaerophilic conditions using the Anaeropack Campylo system (Mitsubishi Gas Chemical, Tokyo, Japan).

### Coupling assay for cholesterol glucosyltransferase activity

The reaction activity of cholesterol glucosyltransferase was measured by coupling with the reactions of pyruvate kinase and lactate dehydrogenase to monitor the consumption of NADH with absorption at 340 nm.<sup>3</sup> The activity was measured at 37 °C in a final volume of 0.1 mL containing 100 mM HEPES buffer (pH 7.5), 2.5 mM MgCl<sub>2</sub>, 0.5 mM phosphoenolpyruvate (PEP), 0.5 mM NADH, 0.1% triton X-100, 2.5 U lactate dehydrogenase, 2U pyruvate kinase. Different fixed amounts of cholesterol were added. The assays were initiated upon the addition of 2 mM UDP glucose.<sup>4</sup>

### Quantitation of phospholipids

The quantification was performed according to the improved procedures using malachite green.<sup>5</sup> The extracted lipids were separated by two-dimensional thin-layer chromatography (2D-TLC) with chloroform/methanol/water (7/1.6/0.2, v/v/v) as the first solvent eluent and chloroform/methanol/water (7/3/0.5, v/v/v) as the second one. Scraped spots obtained from 2D-TLC were transferred into clean glass tubes and added 0.2 mL water and 0.4 mL perchloric acid. The resulting mixtures were heated at 180 °C with sealed tubes for 30-60 min until the yellow color disappeared. After being cooled down to room temperature, the residue was added 0.2 mL water and 2 mL of working solution that contained malachite green and ammonium molybdate. The working solution was prepared according to literature<sup>5</sup>. The resulting mixture was stirred for 20 min and then measured for the absorption at 660 nm with a UV-Vis spectrophotometer.

### Phospholipase hydrolysis

Enzymatic hydrolysis was performed as previously described with some modifications.<sup>6,7</sup> In the PLA1 assay, 5.7 mg MAN-labeled CPG(14:0/19c:0) dissolved in D<sub>2</sub>O/*d*<sub>9</sub>-isopropanol (2:1) was treated with 0.426% (v/v) PLA1 (*Thermomyces lanuginosus*, Sigma) in 10 mM Bis-Tris buffer, pH 6.0, containing 50 mM CaCl<sub>2</sub> for 10 min at 37 °C. In the PLA2 assay, 10 µg MAN-labeled CPG(14:0/19c:0) dissolved in D<sub>2</sub>O/*d*<sub>9</sub>-isopropanol (9:1) was treated with 200 U/mL PLA2 (honey bee venom, Sigma) in 100 mM Tris-HCl, pH 8.5, for 18 h at 37 °C. The reaction progress was monitored by HPLC. After reaction

completion, the reaction mixtures were heated for 5 min at 100 °C and analyzed by <sup>31</sup>P NMR and UPLC-MS.

### **<sup>31</sup>P NMR spectroscopic measurements**

<sup>31</sup>P NMR spectroscopic measurements were performed as previously described.<sup>8</sup> Sample preparation of MAN-labeled lyso-CPG(19c:0) was described in the procedure of PLA1 hydrolysis. <sup>31</sup>P NMR spectra were recorded in 5 mm NMR tubes on a Bruker AVII 500 LC-NMR spectrometer operating at 202.46 MHz for <sup>31</sup>P. All measurements were performed at 25 °C and Waltz-16 composite pulse decoupling to eliminate <sup>31</sup>P-<sup>1</sup>H coupling. Other NMR parameters were shown as follows: 90 ° pulse (9.9 μsec), pulse delay (2 sec) and line broadening (1 Hz). Spectra were processed using the software topspin version 3.0 (Bruker, Germany).

### **Live-cell imaging of AGS cells (to observe lipid rafts formation) that were pretreated with CAGs.**

AGS cells were seeded onto 35 mm dish at 37 °C with 10% CO<sub>2</sub> for overnight. Cells were first washed with PBS for three times before being treated with 5 mM MβCD in serum-free medium for 1 h. After further PBS washes, cells were incubated with Alexa Fluor 594-conjugated cholera toxin subunit beta (Molecular Probes, USA) for 10 min, washed with PBS for three times, and then treated with 10 μM CAG (CAG(10:0, 14:0 or 18:0)) at 37 °C for 0-30 min. The images of serial optical sections (1024 × 1024 pixels) were obtained under 100× Plan-NEOFLUAR lens (laser 543 nm) at 5 min intervals using Zeiss LSM 510 confocal microscope. The live-cell images shown were representative of three independent experiments.

## Supplementary figures

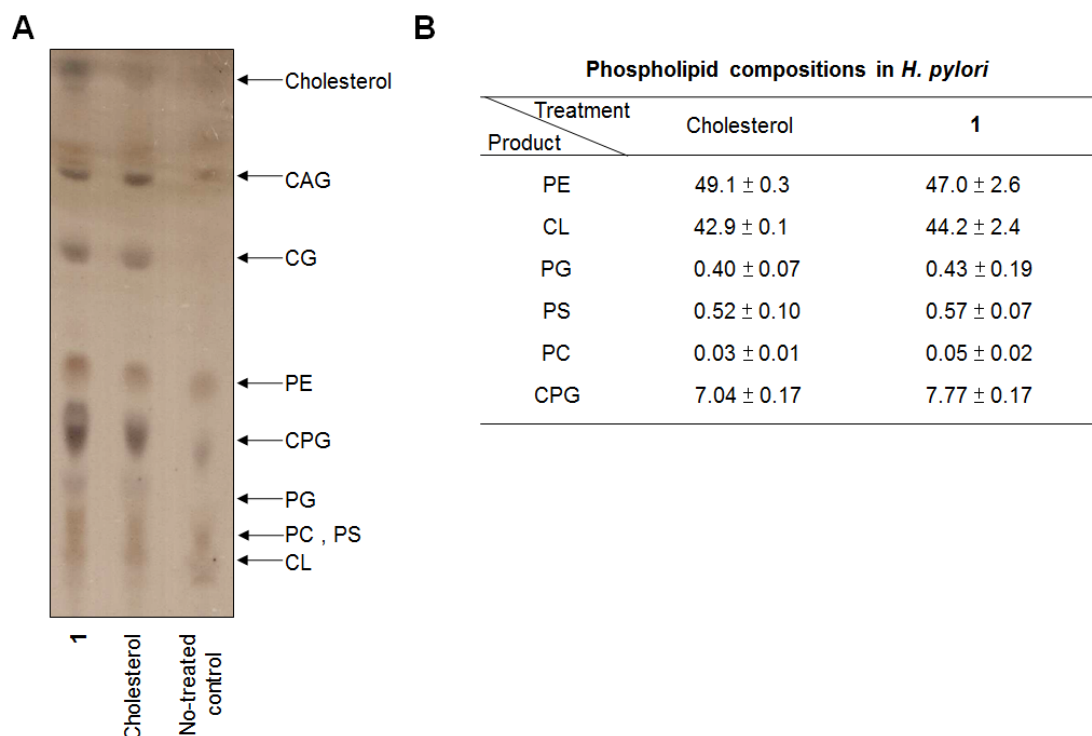

**Fig. S1.** Lipid compositions in *H. pylori* of which the bacterial culture was supplemented with cholesterol or compound **1**. (A) Analysis was carried out by thin layer chromatography (TLC). Total lipids were extracted by Folch extraction from *H. pylori* pre-treated with cholesterol or **1** for two days. The solvent used for TLC was a mixture of chloroform/methanol/water (70/16/2) in volume. The TLC was stained with  $\alpha$ -naphthol for identification of glycolipids. (B) Comparison of phospholipid compositions obtained from the *H. pylori* culture that was supplemented with cholesterol or **1**. The compositions and relative levels of phospholipids were determined by the absorption ( $\lambda_{\text{abs}} = 660 \text{ nm}$ ) from the molybdate complexes. Phospholipids were separated by 2D thin-layer chromatography and digested with perchloric acid to obtain phosphate ion. Phosphate ion was then complexed with malachite green and ammonium molybdate to form the chromogenic molybdate complex. Values were the means of three determinations  $\pm$  standard deviations. Abbreviations: PE, phosphatidylethanolamine; PG, phosphatidylglycerol; PC, phosphatidylcholine; PS, phosphatidylserine; CL, cardiolipin.

**A**

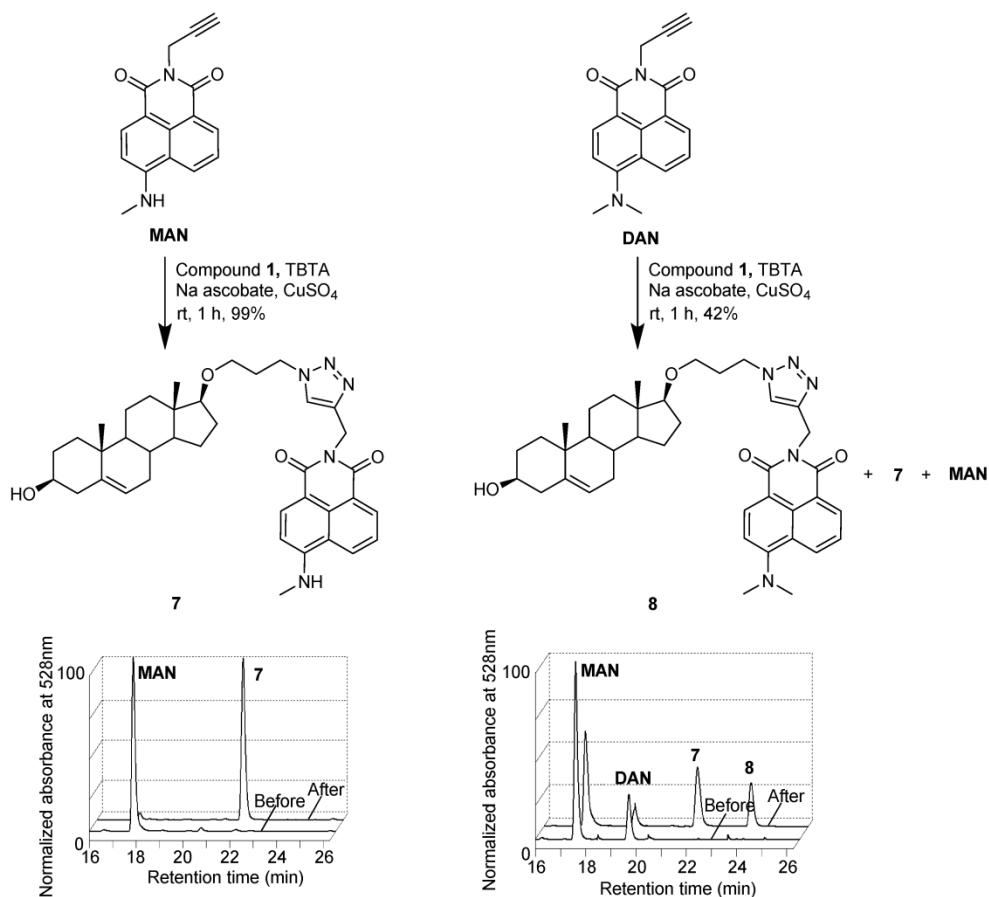

**B**

| Fluorophore                           | Structure | Results                                 |
|---------------------------------------|-----------|-----------------------------------------|
| Alkyne cyanine dye 718 (Sigma)        |           | Unstable                                |
| Alkyne MegaStokes dye 608 (Sigma)     |           | Unstable, low yield in click reaction   |
| Acetylene Fluor 545 (Jena Bioscience) |           | Unstable                                |
| Chromo 642-Alkyne (Jena Bioscience)   |           | Stable, but low yield in click reaction |

**Fig. S2.** The molecular structures of different fluorescent dyes and their results of the Cu[I]-catalyzed azide/alkyne cycloaddition. (A) MAN and DAN were reacted with **1** via Cu(I)-catalyzed 1,3-dipolar cycloaddition in the presence of tris(benzyltriazolylmethyl)amine (TBTA), sodium ascorbate and CuSO<sub>4</sub> for 1 h at room temperature. The HPLC spectra show the product analysis before and after the click reactions. Upon the HPLC analysis, compound DAN was self-degraded to MAN before performing the click reaction. (B) The molecular structures of four different purchased fluorescent dyes and their results of the Cu[I]-catalyzed azide/alkyne cycloaddition. These reaction progresses were monitored by TLC or HPLC.

**Fig. S3.** The molecular structures and corresponding MS and MS/MS spectra of (A) CAG(14:0); (B) CAG(18:1); (C) CAG(19c:0); (D) CAG(16:0); (E) CAG(18:0); (F) CAG(18:2); (G) CAG(20:4); (H) CPG(14:0/14:0); (I) CPG(14:0/18:1); (J) CPG(19c:0/18:1); (K) CPG(19c:0/19c:0); (L) CPG(14:0/16:0); (M) CPG(16:0/18:1); (N) CPG(16:0/19c:0); (O) CPG(18:1/18:1); (P) CPG(18:0/18:0); (Q) lyso-CPG(14:0); (R) lyso-CPG(18:1); (S) lyso-CPG(19c:0). All the parent ions and their daughter ions were detected by MS and MS/MS, respectively. In the molecular structures shown below, the dashed arrows and numbers indicate the fragmented structures and the corresponding molecular weights, respectively. CID, collision-induced dissociation; HCD, higher-energy collisional dissociation.

**A**

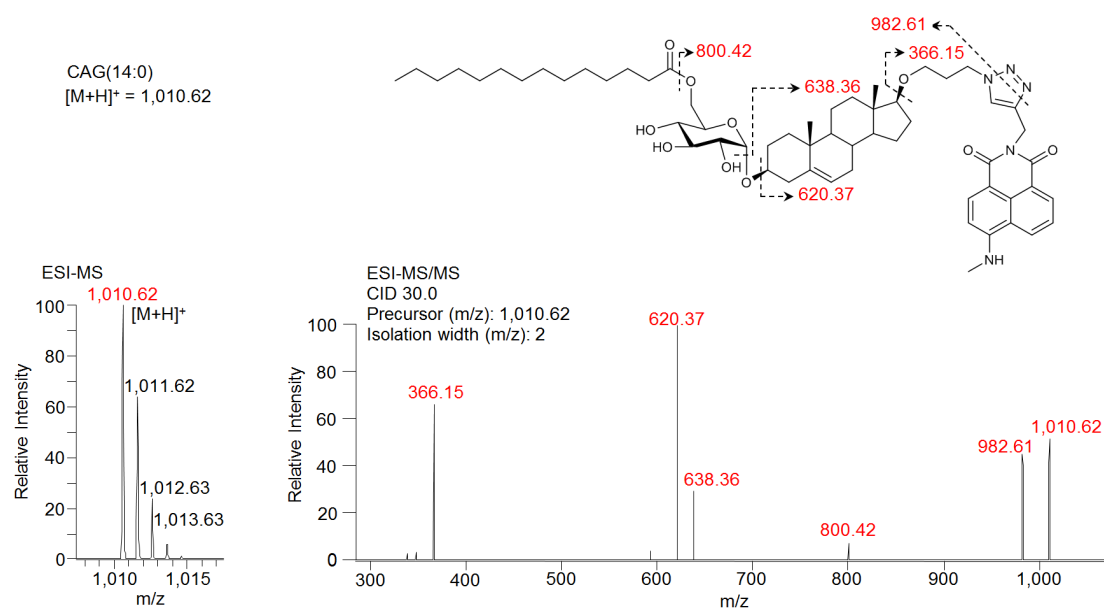

**B**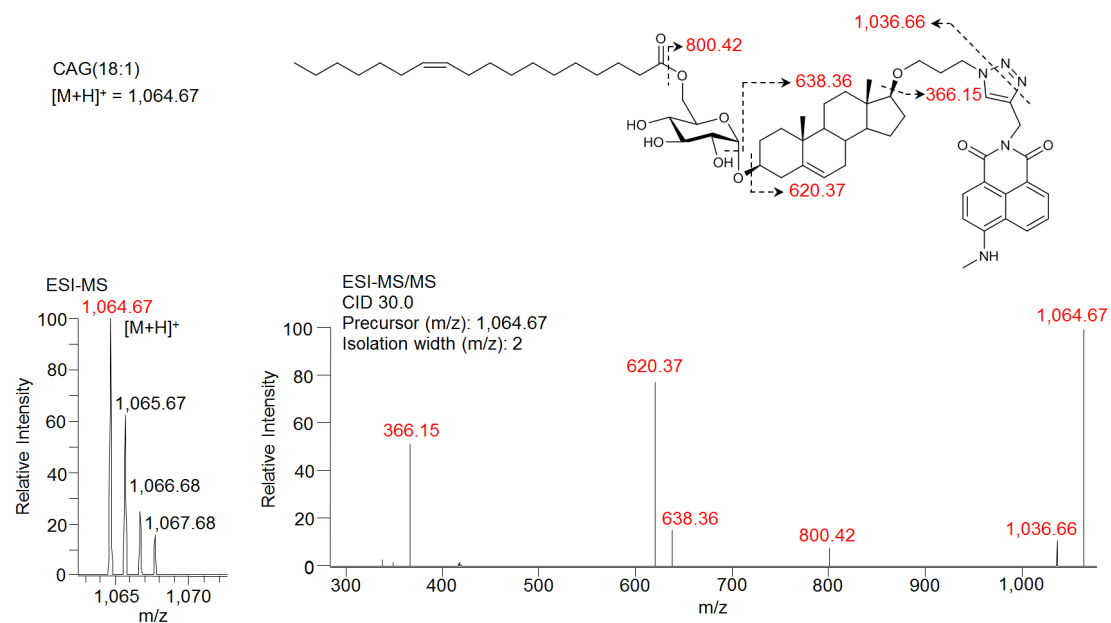**C**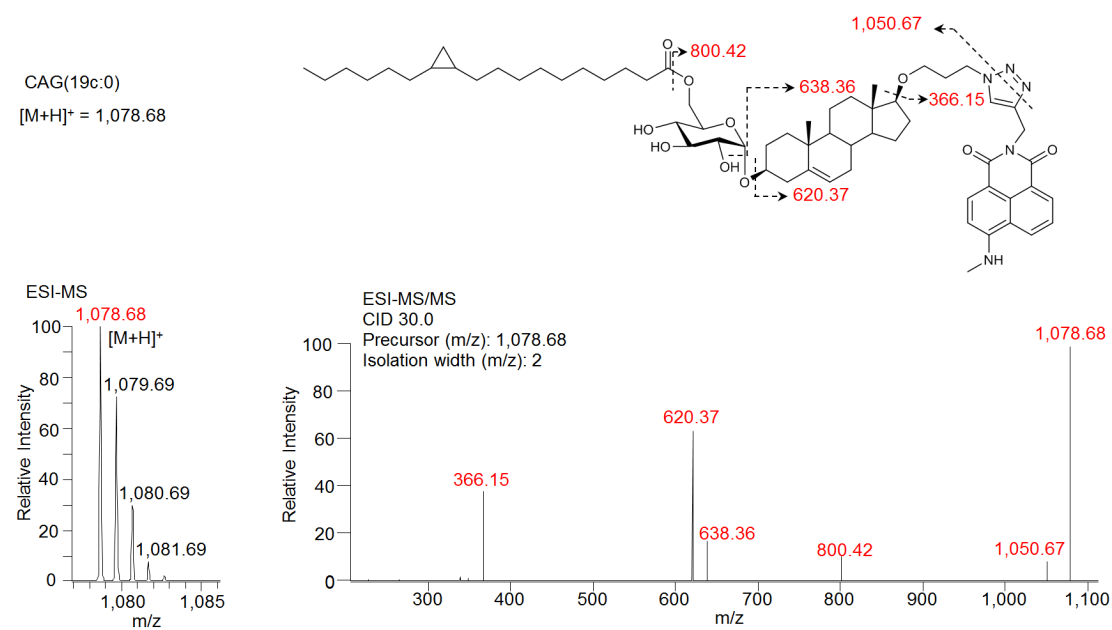

**D**

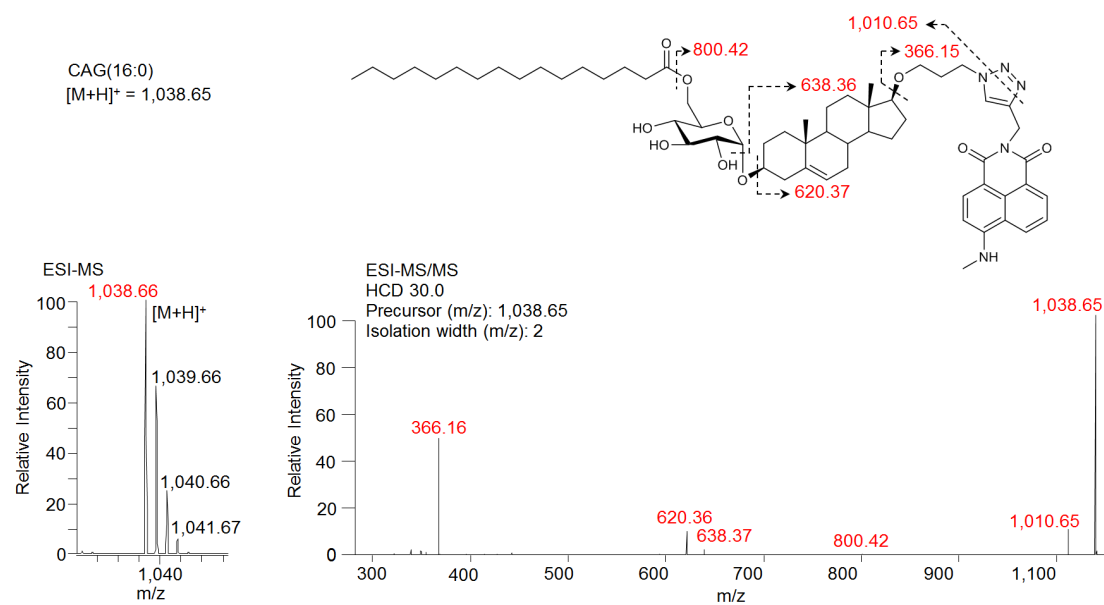

**E**

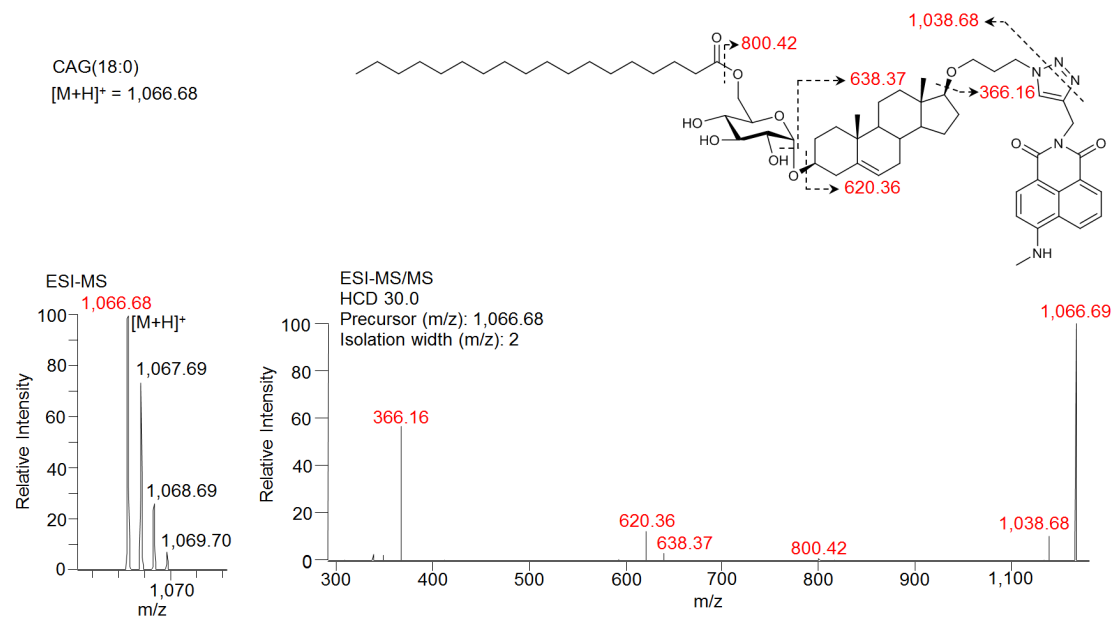



**F**

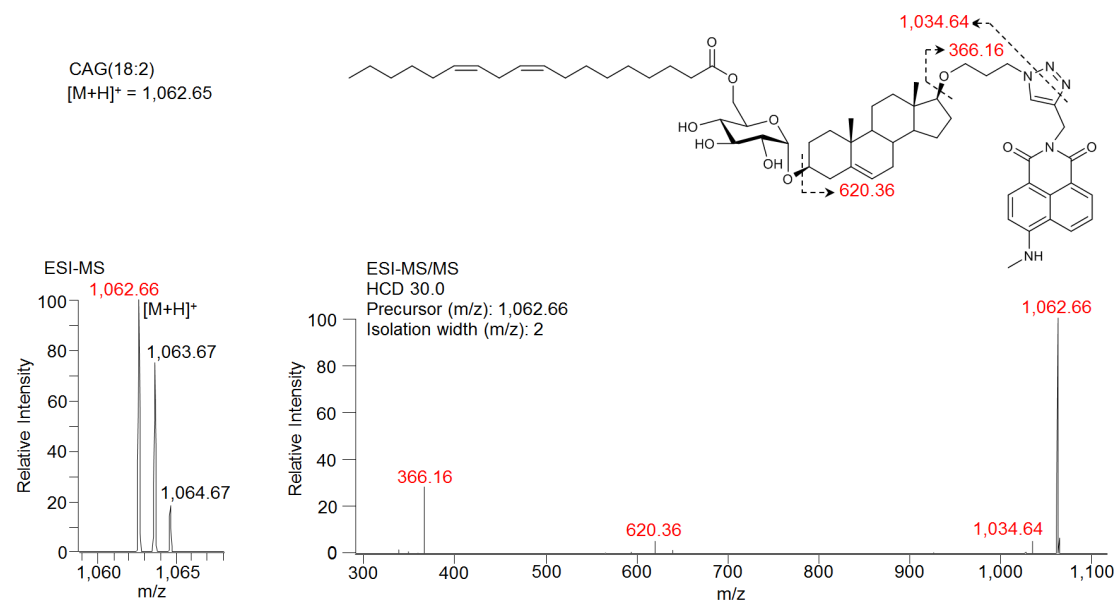

**G**

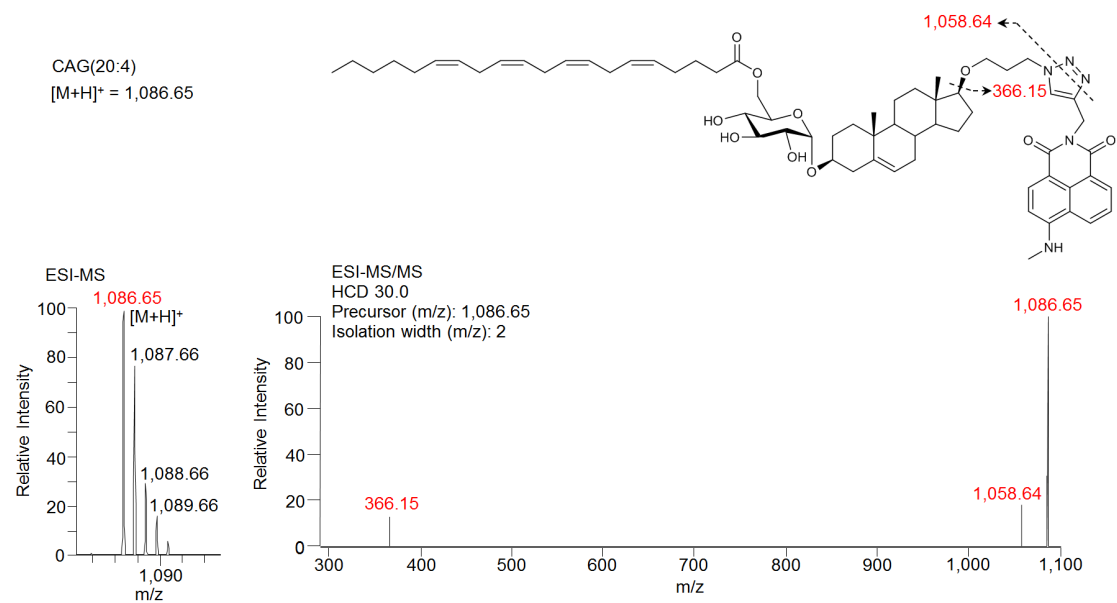

H

CPG(14:0/14:0)  
[M+H]<sup>+</sup> = 1,374.82

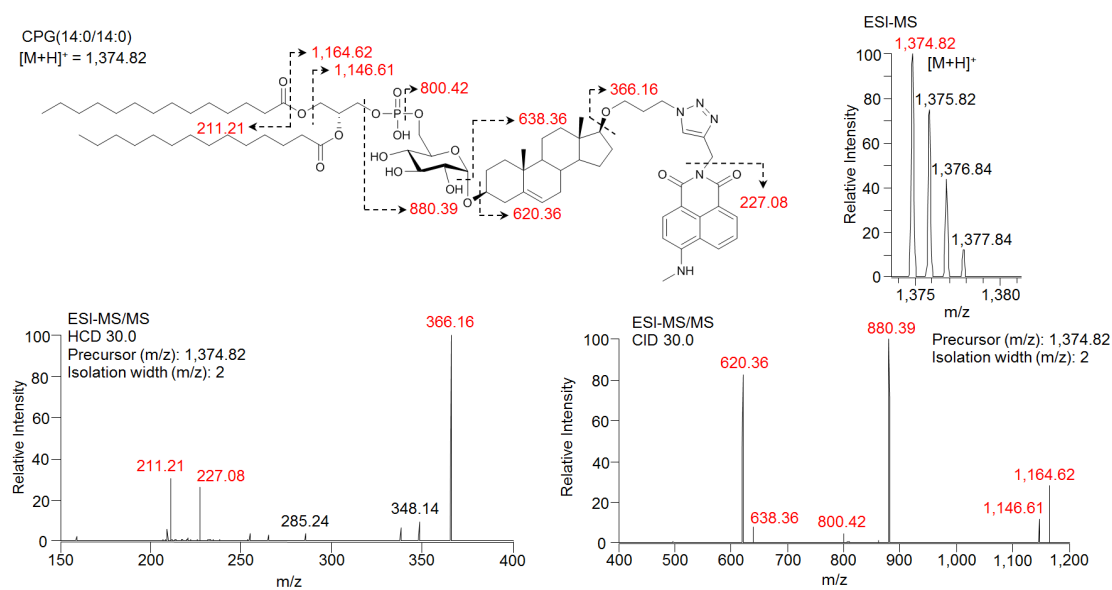

I

CPG(14:0/18:1)  
[M+H]<sup>+</sup> = 1,428.87

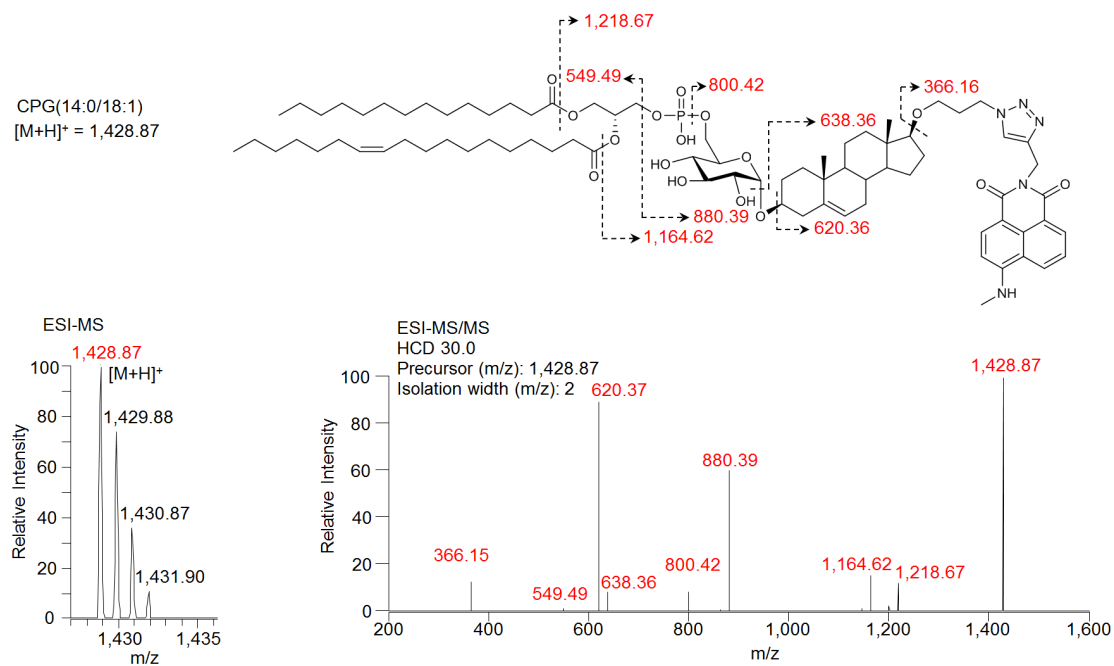

**J**

CPG(19c:0/18:1)  
[M+H]<sup>+</sup> = 1,496.93

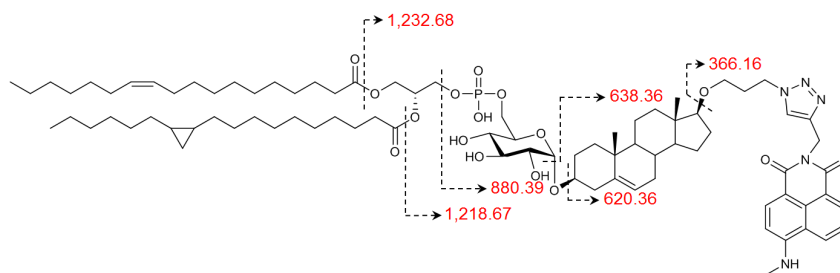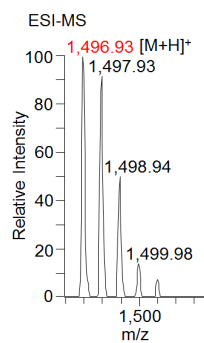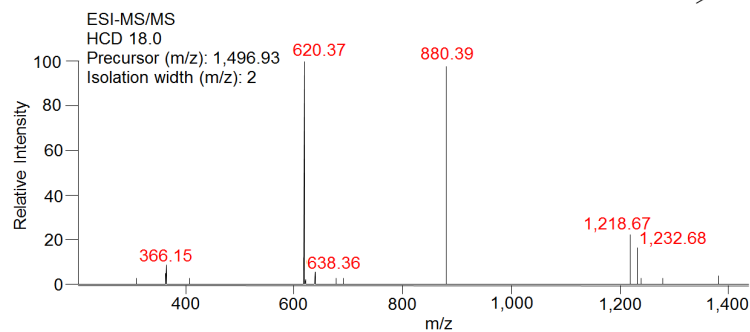

**K**

CPG(19c:0/19c:0)  
[M+H]<sup>+</sup> = 1,510.95

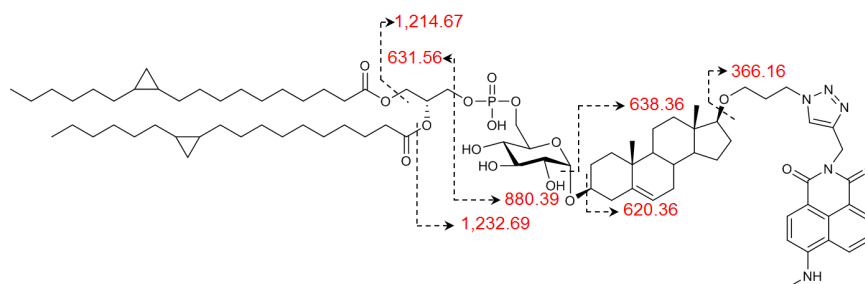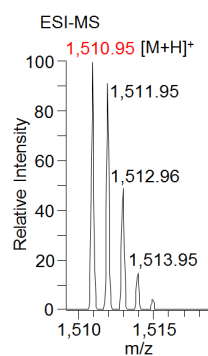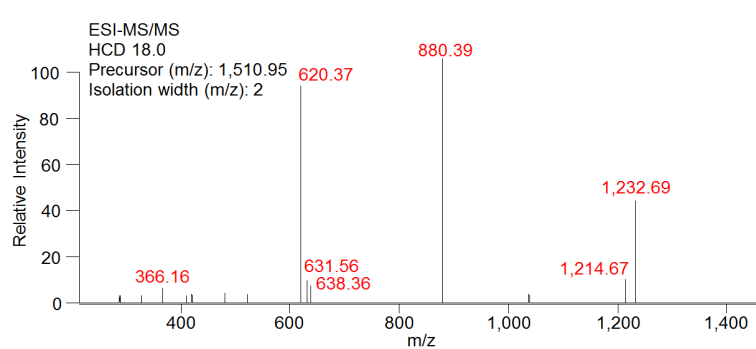

**L**

CPG(14:0/16:0)  
[M+H]<sup>+</sup> = 1,402.85

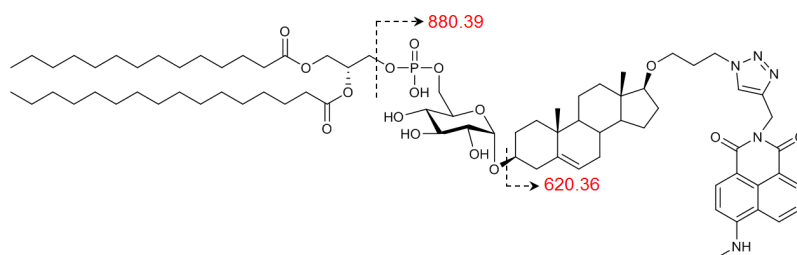

ESI-MS

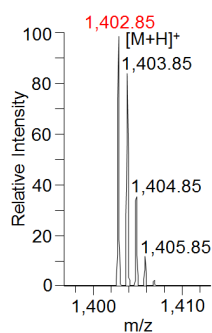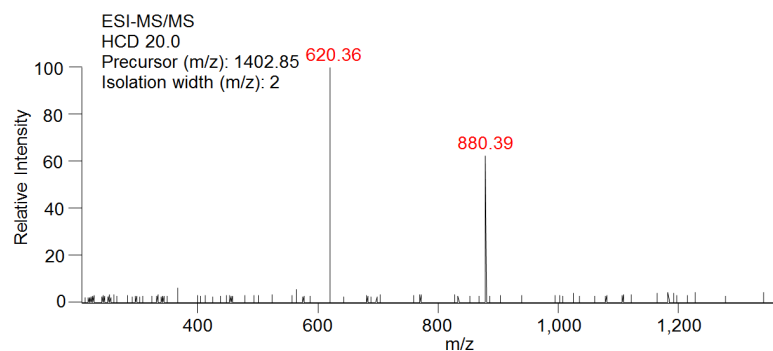

**M**

CPG(16:0/18:1)  
[M+H]<sup>+</sup> = 1,456.90

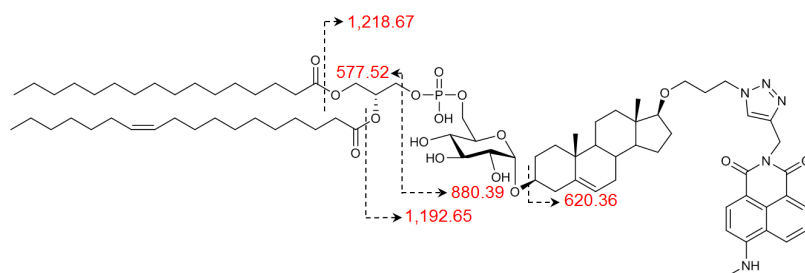

ESI-MS

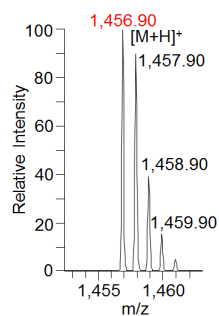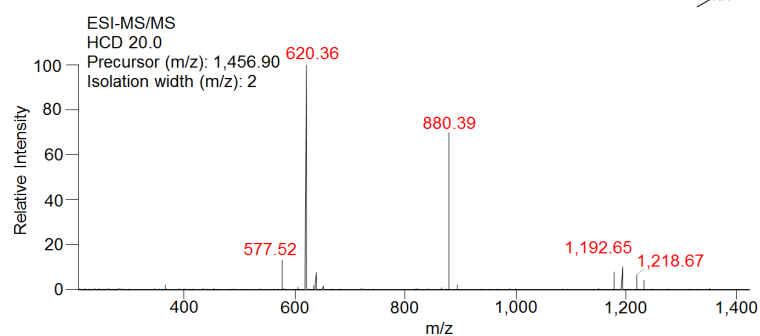

N

CPG(16:0/19c:0)  
[M+H]<sup>+</sup> = 1,470.92

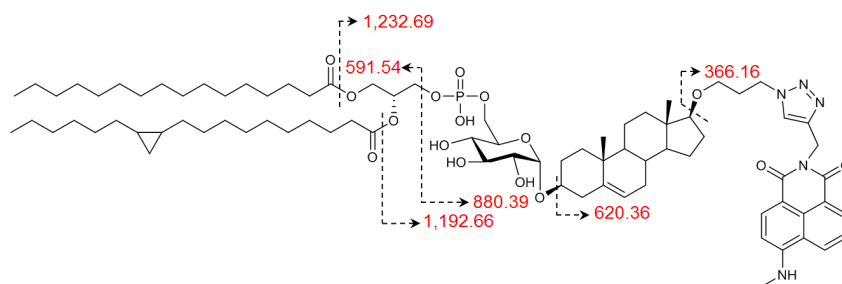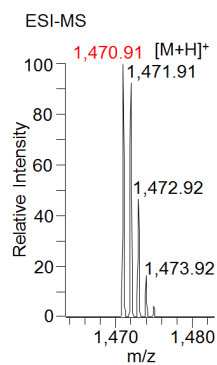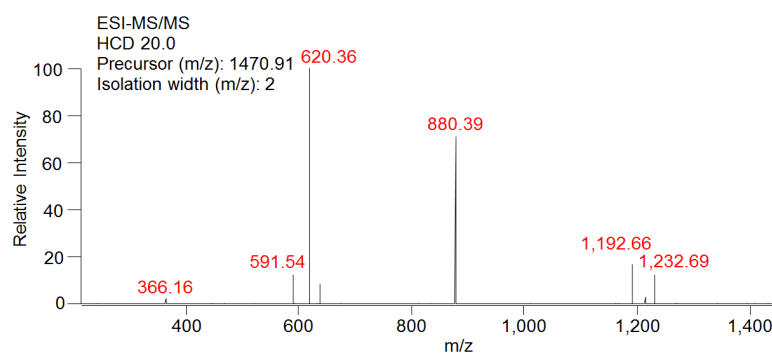

O

CPG(18:1/18:1)  
[M+H]<sup>+</sup> = 1,482.92

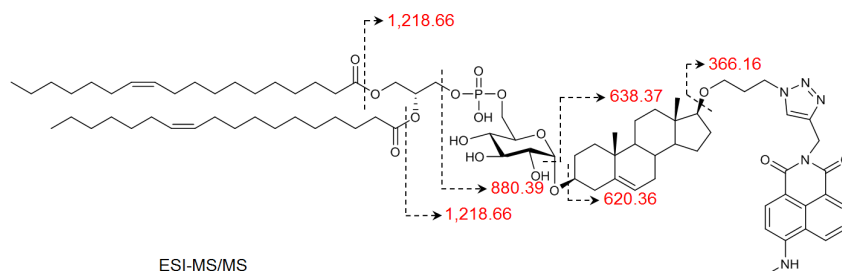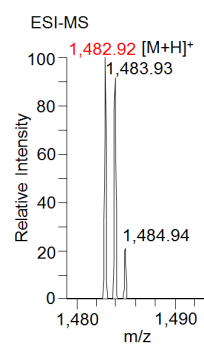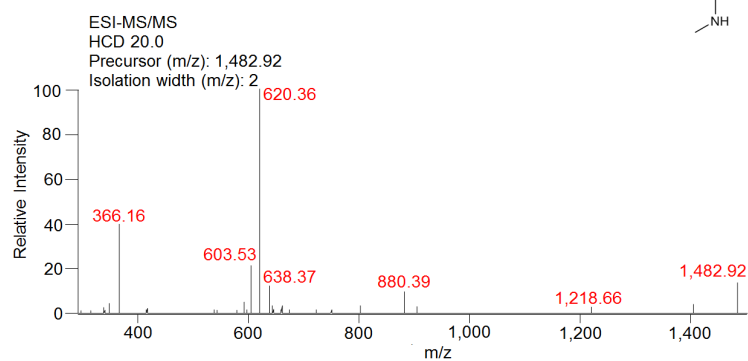

**P**

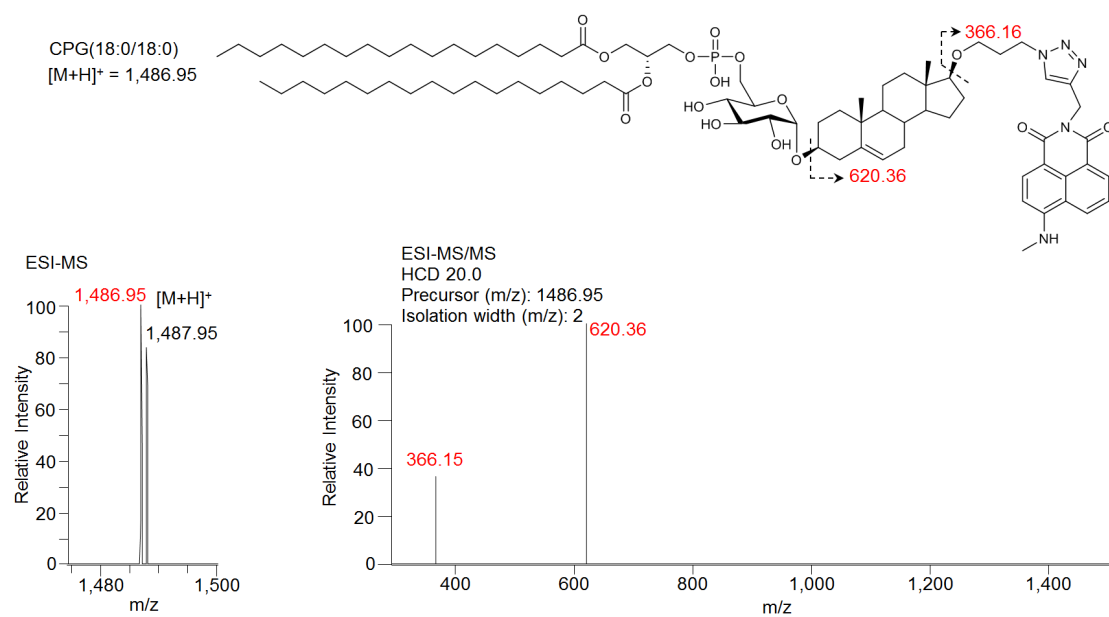

**Q**

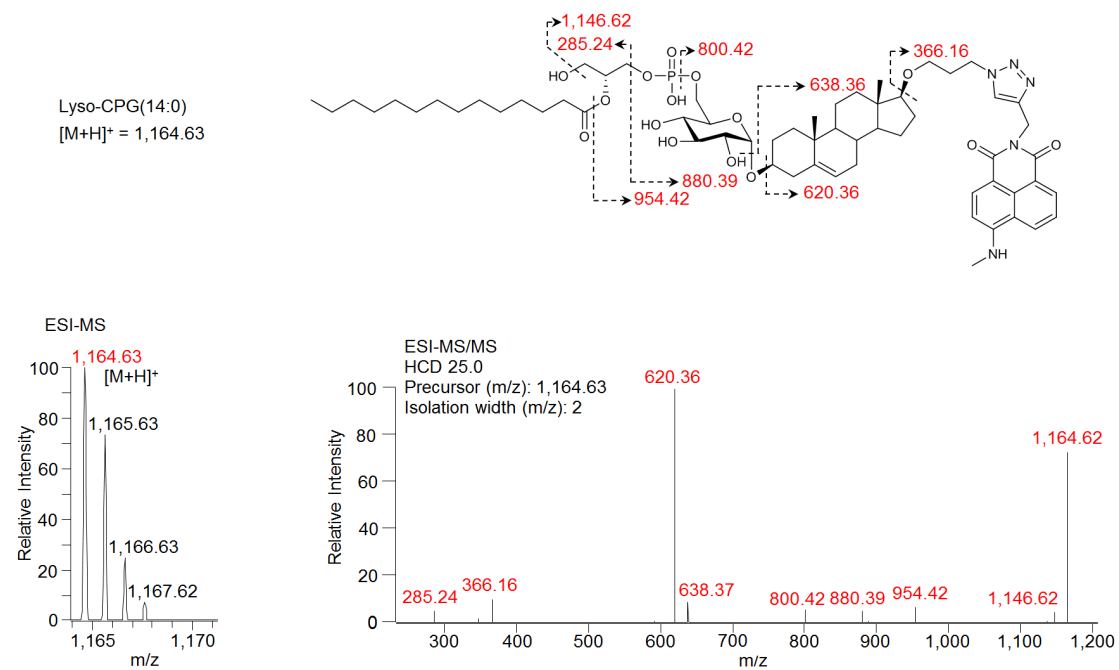

**R**

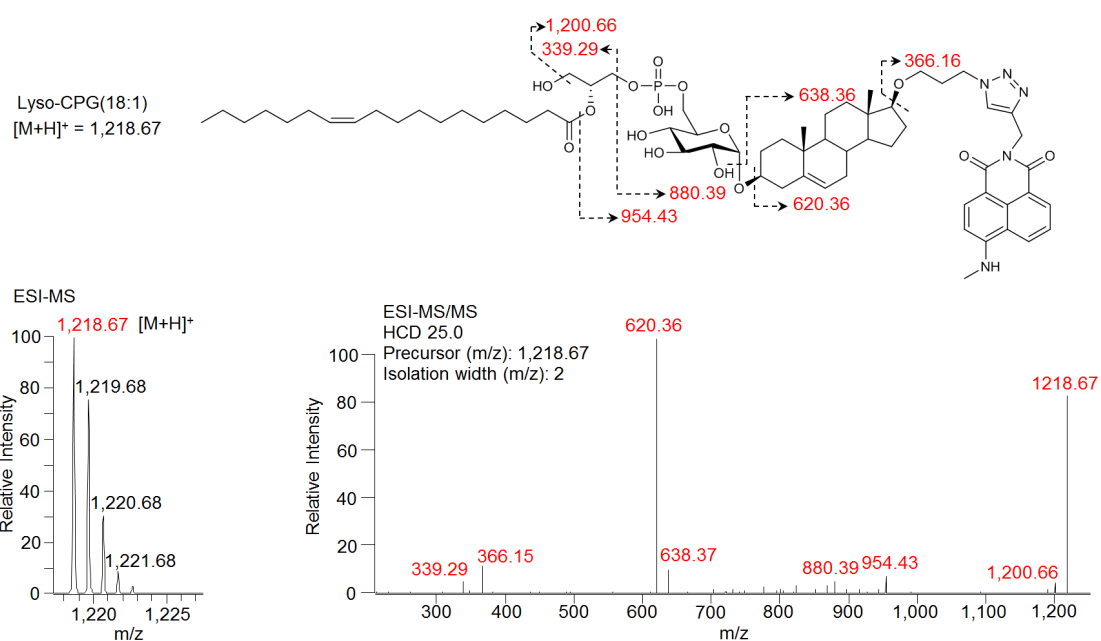

**S**

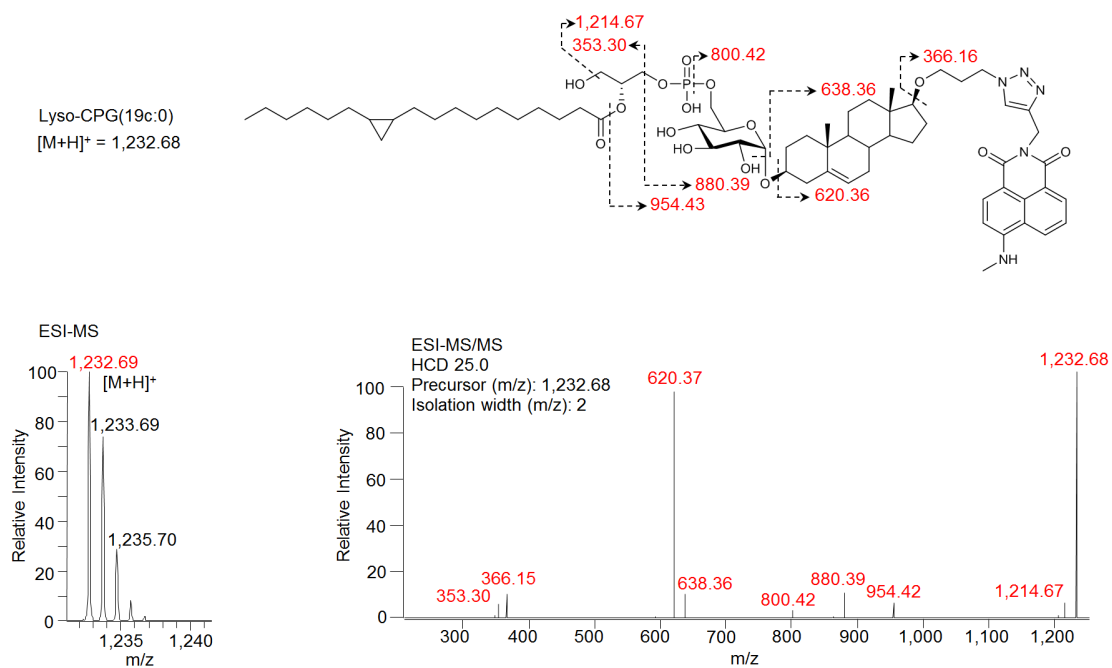

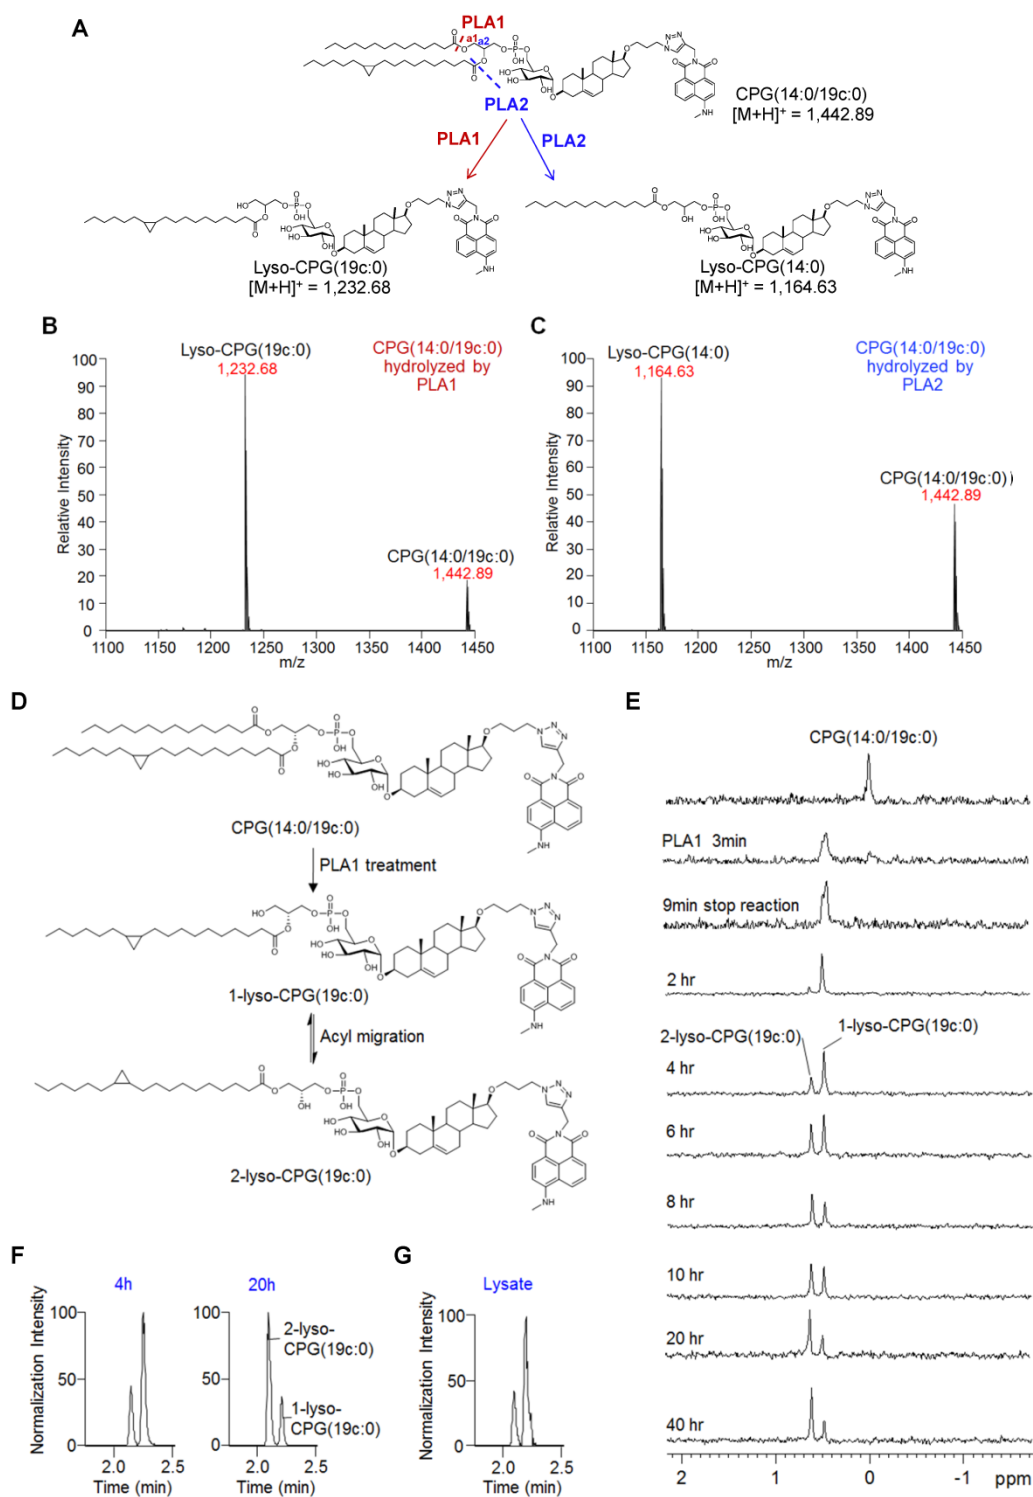

**Fig. S4.** Structural determination of CPG(14:0/19c:0) by using enzymatic hydrolysis (A) A scheme presents the regioselective hydrolysis of CPG(14:0/19c:0) by phospholipase A1 (PLA1, left) or phospholipase A2 (PLA2, right). (B) and (C) show the UPLC-MS spectra of the products of PLA1 and PLA2 reactions, respectively. (D-G) <sup>31</sup>P NMR employed to monitor the phospholipase A1 (PLA1)-catalyzed hydrolysis of CPG(14:0/19c:0) (D) The scheme shows PLA1-catalyzed hydrolysis of



CPG(14:0/19c:0) to give 1-lyso-CPG(19c:0), followed by acyl migration to additionally produce 2-lyso-CPG(19c:0). (E)  $^{31}\text{P}$  NMR spectra were used to monitor the formation of 1-lyso-CPG(19c:0) (the chemical shift is  $\sim\delta$  0.5) and 2-lyso-CPG(19c:0) ( $\sim\delta$  0.6). (F) The signals in the  $^{31}\text{P}$  NMR spectra were further confirmed by UPLC-MS analysis. For instance, the previous samples at 4 h and 20 h were analyzed by UPLC-MS to indicate the consistent signal ratios. (G) The mixture of lyso-CPG(19c:0) obtained from the lysate was analyzed by UPLC-MS.

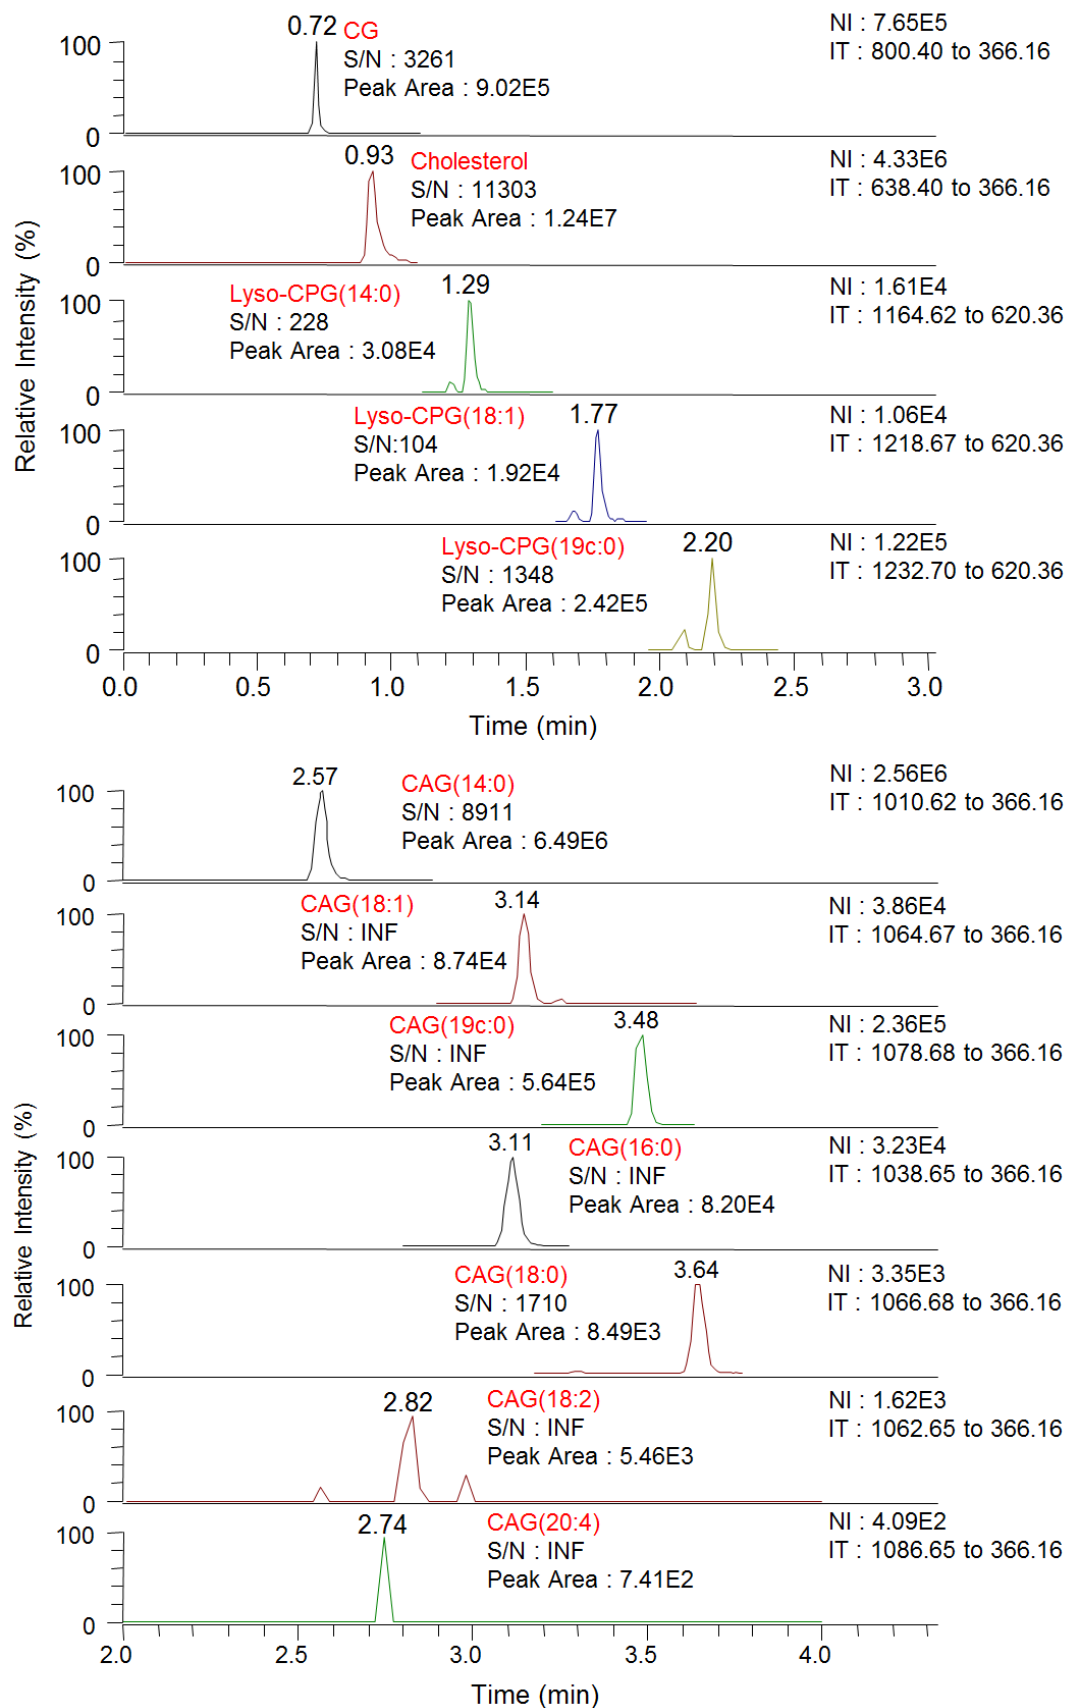

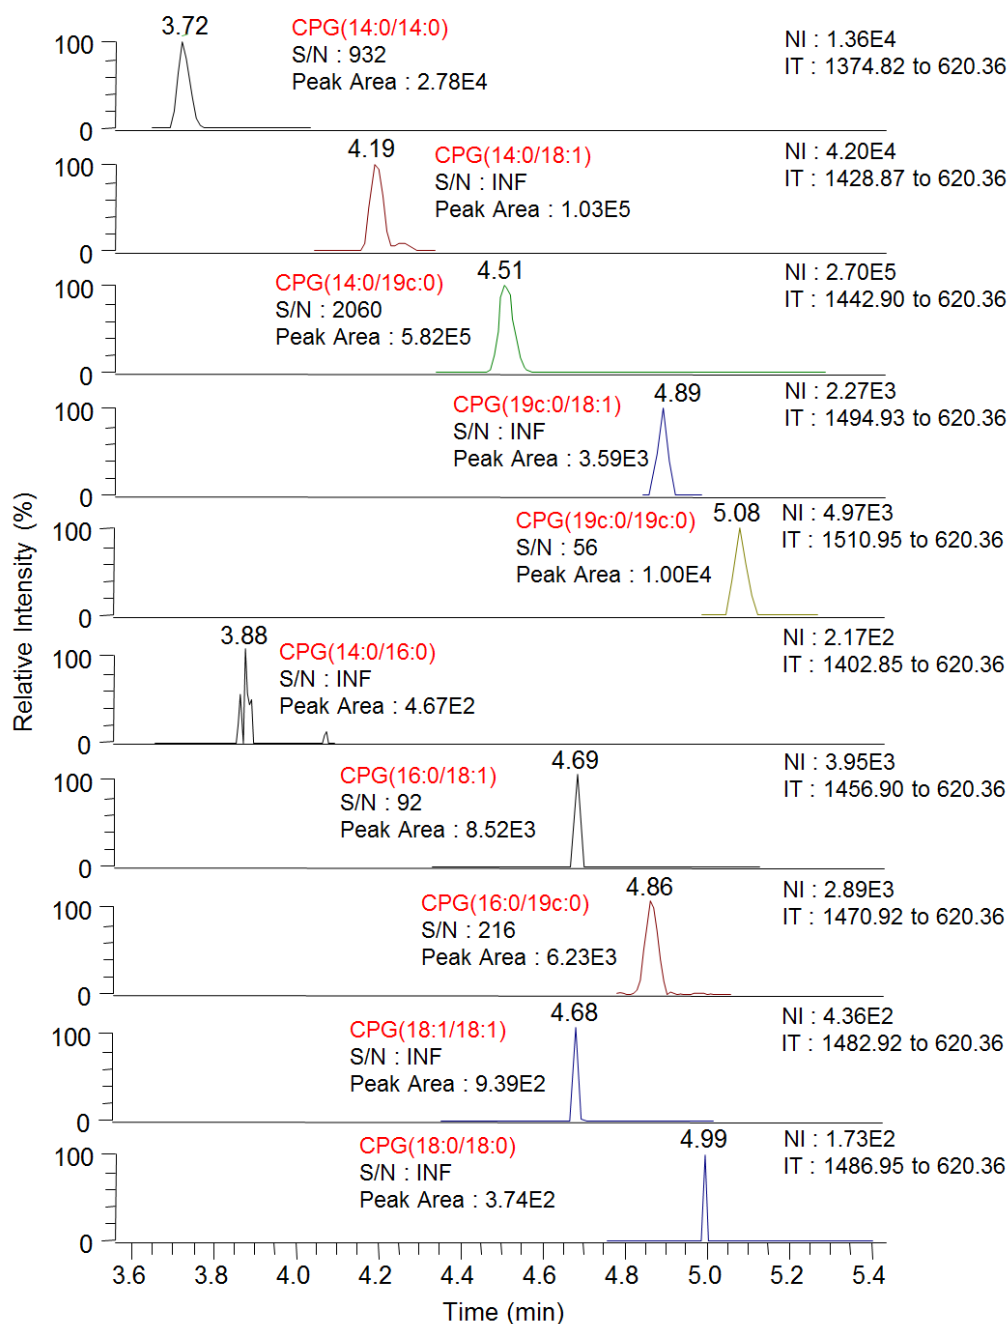

**Fig. S5.** Selected ion chromatograms for specific transitions of different fluorophore-labeled CGDs. MAN-labeled CGDs were analyzed by UPLC-MS/MS in product ion scan mode. IT, ion transition, denotes the specific fragmentation peaks ( $m/z$  of 366.16 or 620.36) that are disintegrated from various target parent ions. S/N denotes signal-to-noise ratio. INF denotes infinity. NI denotes normalization intensity. Peak area was obtained from the specific fragmentation peak and used to quantify MAN-labeled CGDs by the calibration curves.

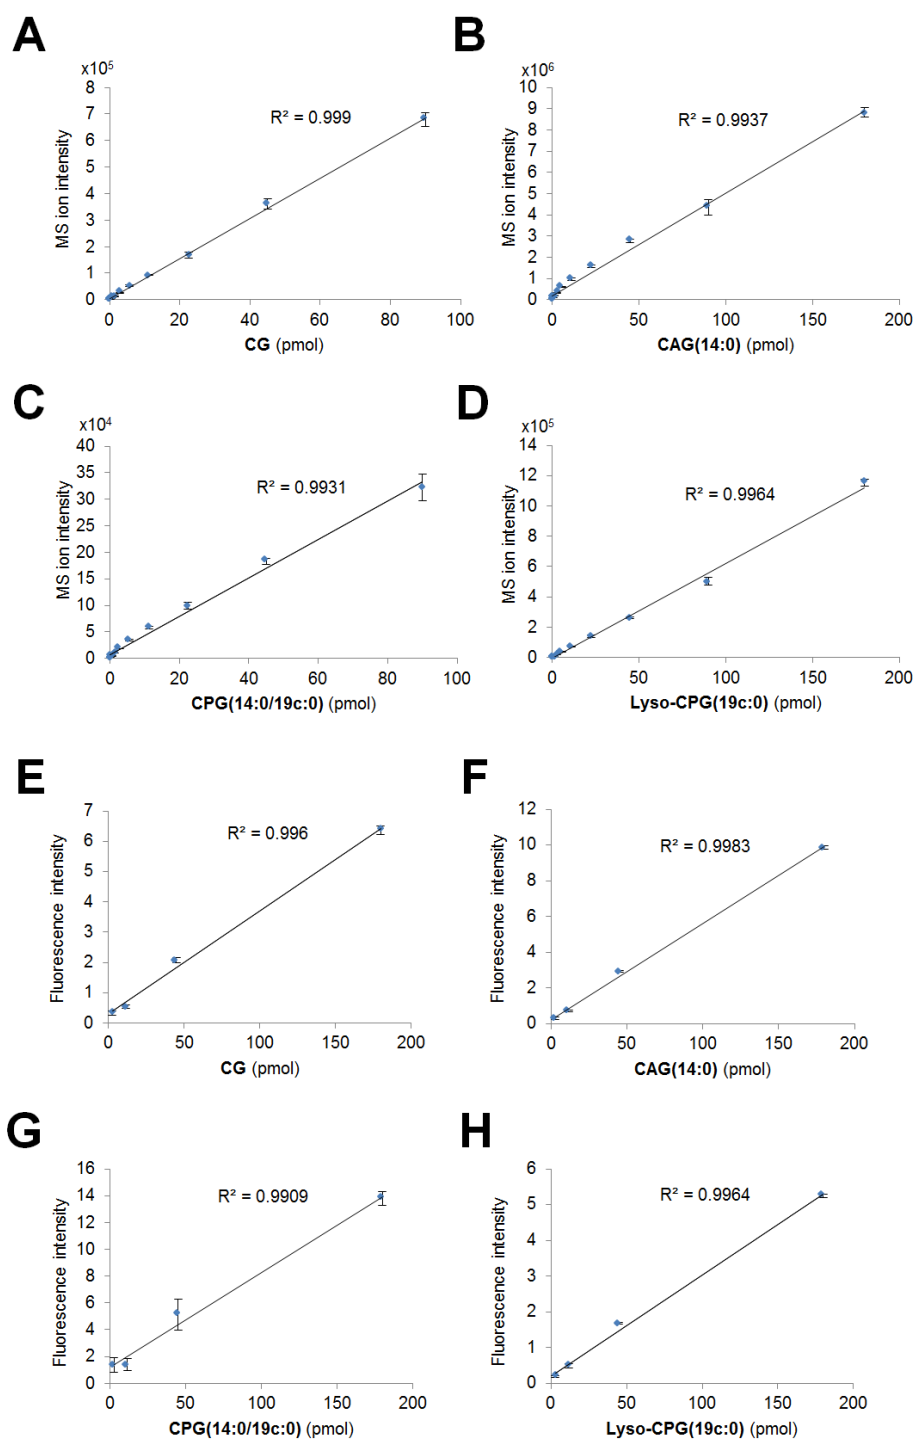

**Fig. S6.** Calibration curves of MAN-labeled CG, CAG, CPG and lyso-CPG analyzed by UPLC-MS/MS and HPLC-fluorescence. (A-D) Calibration curves of MAN-labeled CGs analyzed by UPLC-MS/MS. Calibration curves were obtained by analyzing the MS ion intensities of standards at 0.088, 0.176, 0.35, 0.7, 1.4, 2.8, 5.6, 11.25, 22.5, 45 and 90 pmol measured by UPLC-MS operated in product ion scan mode (UPLC-MS/MS). MAN-labeled CPG(14:0/19c:0), CAG(14:0), Lyso-CPG(19c:0) and CG were purified from bacteria lysate and used as the standard compounds for establishing the calibration curves. (E-H) Calibration curves of MAN-labeled CGs analyzed by

HPLC-fluorescence. HPLC-fluorescence means HPLC analysis by using fluorescence detection for quantification ( $\lambda_{\text{exi}}$  and  $\lambda_{\text{emi}}$ = 428 and 528 nm, respectively). The calibration curves were obtained by measuring fluorescence intensities of purified CG, CAG(14:0), CPG(14:0/19c:0) and lyso-CPG(19c:0) in a series of dilutions. Data shown were from one experiment with three technical replicates. Error bars represented standard deviations.

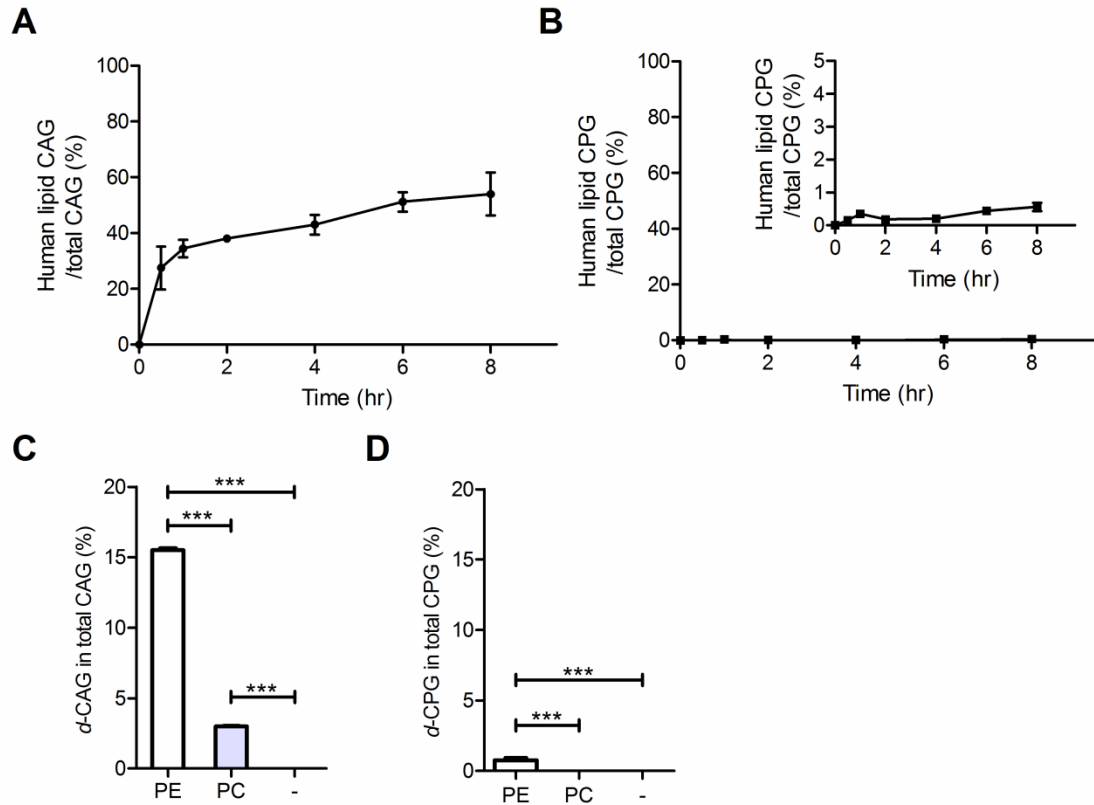

**Fig. S7.** Levels of the incorporated CAGs and CPGs. (A and B) Levels of the incorporated CAGs and CPGs at different times. Previously in the main text, *H. pylori* was shown to take human lipids for the biosynthesis of CAGs and CPGs in *H. pylori*. (A) Ratios of human-lipid-containing CAGs to total CAGs in *H. pylori* (26695) at 0.5, 1, 2, 4, 6, 8 h after co-culturing with AGS cells. *H. pylori* was used to infect AGS cells and the amount of CAGs containing different acyl chains was measured by UPLC-MS. Human-lipid-containing CAGs are composed of CAG(16:0), CAG(18:0), CAG(18:1), CAG(18:2) and CAG(20:4). In addition to human-lipid-containing CAGs, total CAGs also contain CAG(14:0) and CAG(19c:0) that are dominant in *H. pylori*. (B) Ratios of human-lipid-containing CPGs to total CPGs in *H. pylori* (26695) at 0.5, 1, 2, 4, 6, 8 h after co-culturing with AGS cells. Human-lipid-containing CPGs are composed of CPG(16:0/18:1), CPG(18:0/18:0) and CPG(18:1/18:1). In addition to human-lipid-containing CPGs, total CPGs also contain CPG(14:0/14:0), CPG(14:0/18:1) and CPG(14:0/19c:0) that are dominant in *H. pylori*. 5% of the y axis of (B) was expanded and shown in the inserted. (C and D) Relative levels of deuterium-labeled CAG (C) and CPG (D) in the *H. pylori*-infected AGS cells. AGS cells were first treated with deuterium-labeled phosphatidylethanolamine (PE) or phosphatidylcholine (PC) for 1 h, and then infected with *H. pylori* (26695) for 6 h. The ratios of deuterium-labeled CAG and CPG (namely *d*-CAG and *d*-CPG, respectively) to total CAGs and CPGs were determined by the area of product ion signals shown in the UPLC-MS spectra. Data shown were from three biological replicates. Error bars represented standard deviations. All statistically significant differences are indicated with asterisks, \*\*\* $P < 0.001$ , based on Student's *t* test.

## Supplementary tables

**Table S1 Kinetic parameters of cholesterol and its analogues in the catalysis of cholesterol- $\alpha$ -glucosyltransferase<sup>a</sup>**

| substrate    | $k_{\text{cat}}$ ( $\text{min}^{-1}$ ) | $K_m$ ( $\mu\text{M}$ ) | $k_{\text{cat}}/K_m$ ( $\mu\text{M}^{-1}\text{min}^{-1}$ ) | Normalized catalytic efficiency (%) |
|--------------|----------------------------------------|-------------------------|------------------------------------------------------------|-------------------------------------|
| Cholesterol  | $3.58 \pm 0.37$                        | $66.33 \pm 15.99$       | $0.0539 \pm 0.0141$                                        | 100.0                               |
| <b>1</b>     | $6.13 \pm 0.46$                        | $134.80 \pm 19.65$      | $0.0455 \pm 0.0074$                                        | 84.3                                |
| <b>2</b>     | $6.82 \pm 0.41$                        | $193.10 \pm 20.25$      | $0.0353 \pm 0.0043$                                        | 65.5                                |
| <b>3</b>     | $10.41 \pm 2.65$                       | $324.70 \pm 88.90$      | $0.0321 \pm 0.0105$                                        | 59.5                                |
| Ergosterol   | $0.30 \pm 0.11$                        | $40.70 \pm 17.20$       | $0.0070 \pm 0.0033$                                        | 12.9                                |
| Stigmasterol | $0.68 \pm 0.14$                        | $186.30 \pm 62.25$      | $0.0036 \pm 0.0014$                                        | 6.73                                |

<sup>a</sup> The measurement was carried out at 37 °C. On the saturated concentration of UDP-glucose (2mM), steady state velocities were fitted to the equation:  $v = V_{\text{max}} \times [X]/(K_m + X)$ , [X] represent the concentrations of cholesterol.  $K_m$  denotes the Michaelis constants of cholesterol.  $k_{\text{cat}}$  is the turnover number. The catalytic efficiency can be expressed by the term  $k_{\text{cat}}/K_m$ . Values were the means of three determinations  $\pm$  standard deviations. Notably the velocities of 22-NBD-cholesterol and 25-NBD-cholesterol were not able to fit to the equation due to little or no consumption of NADH in their reaction. 22-NBD-cholesterol represents 22-(*N*-(7-nitrobenz-2-oxa-1,3-diazol-4-yl)amino)-23,24-bisnor-5-cholesten-3 $\beta$ -ol; 25-NBD-cholesterol denotes 25-[*N*-[(7-nitrobenz-2-oxa-1,3-diazol-4-yl)-methyl]amino]-27-norcholesterol.<sup>3, 4, 9</sup>

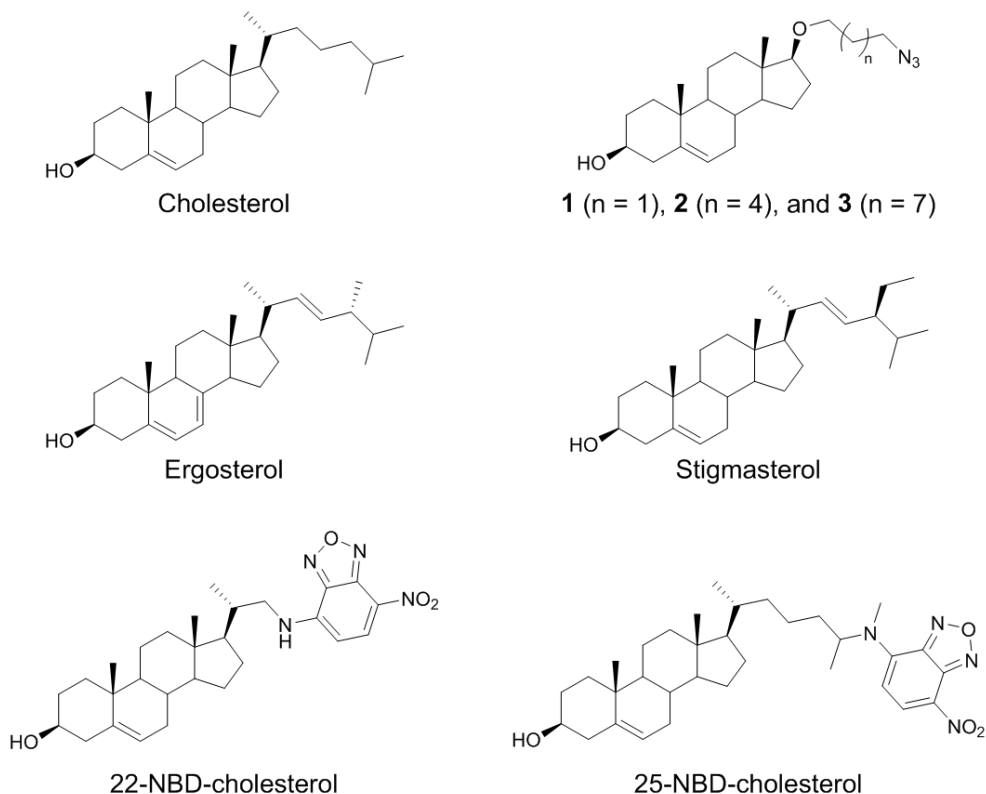

**Table S2. The theoretical and observed m/z (mass-to-charge ratio) and RIA (relative isotopic abundance) errors of the molecular ions of CGDs detected in UPLC-MS analysis**

| <b>MAN-labeled<br/>CG compounds</b> | <b>Ion formula</b>                                                | <b>Theor.<br/>m/z [M+H]<sup>+</sup></b> | <b>Observed<br/>m/z [M+H]<sup>+</sup></b> | <b>MS1<br/><math>\Delta</math>ppm</b> | <b>RIA<br/>error (%)</b> |
|-------------------------------------|-------------------------------------------------------------------|-----------------------------------------|-------------------------------------------|---------------------------------------|--------------------------|
| CAG(14:0)                           | C <sub>58</sub> H <sub>84</sub> N <sub>5</sub> O <sub>10</sub>    | 1010.621                                | 1010.619                                  | 2.25                                  | 4.36                     |
| CAG(18:1)                           | C <sub>62</sub> H <sub>90</sub> N <sub>5</sub> O <sub>10</sub>    | 1064.668                                | 1064.665                                  | 3.02                                  | 4.43                     |
| CAG(19c:0)                          | C <sub>63</sub> H <sub>92</sub> N <sub>5</sub> O <sub>10</sub>    | 1078.684                                | 1078.683                                  | 0.81                                  | 4.15                     |
| CAG(16:0)                           | C <sub>60</sub> H <sub>88</sub> N <sub>5</sub> O <sub>10</sub>    | 1038.653                                | 1038.657                                  | 3.97                                  | 3.19                     |
| CAG(18:0)                           | C <sub>62</sub> H <sub>92</sub> N <sub>5</sub> O <sub>10</sub>    | 1066.684                                | 1066.684                                  | 0.49                                  | 2.15                     |
| CAG(18:2)                           | C <sub>62</sub> H <sub>88</sub> N <sub>5</sub> O <sub>10</sub>    | 1062.653                                | 1062.657                                  | 4.07                                  | 1.77                     |
| CAG(20:4)                           | C <sub>64</sub> H <sub>88</sub> N <sub>5</sub> O <sub>10</sub>    | 1086.653                                | 1086.654                                  | 1.21                                  | 4.84                     |
| CPG(14:0/14:0)                      | C <sub>75</sub> H <sub>117</sub> N <sub>5</sub> O <sub>16</sub> P | 1374.823                                | 1374.818                                  | 3.45                                  | 4.37                     |
| CPG(14:0/18:1)                      | C <sub>79</sub> H <sub>123</sub> N <sub>5</sub> O <sub>16</sub> P | 1428.870                                | 1428.870                                  | 0.21                                  | 3.85                     |
| CPG(14:0/19c:0)                     | C <sub>80</sub> H <sub>125</sub> N <sub>5</sub> O <sub>16</sub> P | 1442.885                                | 1442.890                                  | 3.22                                  | 4.64                     |
| CPG(19c:0/18:1)                     | C <sub>84</sub> H <sub>131</sub> N <sub>5</sub> O <sub>16</sub> P | 1496.932                                | 1496.930                                  | 1.29                                  | 2.28                     |
| CPG(19c:0/19c:0)                    | C <sub>85</sub> H <sub>133</sub> N <sub>5</sub> O <sub>16</sub> P | 1510.948                                | 1510.946                                  | 1.54                                  | 3.21                     |
| CPG(14:0/16:0)                      | C <sub>77</sub> H <sub>121</sub> N <sub>5</sub> O <sub>16</sub> P | 1402.854                                | 1402.849                                  | 3.62                                  | 1.11                     |
| CPG(16:0/18:1)                      | C <sub>81</sub> H <sub>127</sub> N <sub>5</sub> O <sub>16</sub> P | 1456.901                                | 1456.900                                  | 0.88                                  | 1.08                     |
| CPG(16:0/19c:0)                     | C <sub>82</sub> H <sub>129</sub> N <sub>5</sub> O <sub>16</sub> P | 1470.917                                | 1470.911                                  | 3.59                                  | 2.20                     |
| CPG(18:1/18:1)                      | C <sub>83</sub> H <sub>129</sub> N <sub>5</sub> O <sub>16</sub> P | 1482.917                                | 1482.924                                  | 4.75                                  | 3.00                     |
| CPG(18:0/18:0)                      | C <sub>83</sub> H <sub>133</sub> N <sub>5</sub> O <sub>16</sub> P | 1486.948                                | 1486.951                                  | 2.15                                  | 2.15                     |
| Lyso-CPG(14:0)                      | C <sub>61</sub> H <sub>91</sub> N <sub>5</sub> O <sub>15</sub> P  | 1164.624                                | 1164.626                                  | 1.39                                  | 3.44                     |
| Lyso-CPG(18:1)                      | C <sub>65</sub> H <sub>97</sub> N <sub>5</sub> O <sub>15</sub> P  | 1218.671                                | 1218.668                                  | 2.90                                  | 3.76                     |
| Lyso-CPG(19c:0)                     | C <sub>66</sub> H <sub>99</sub> N <sub>5</sub> O <sub>15</sub> P  | 1232.687                                | 1232.685                                  | 1.61                                  | 3.01                     |



**Table S3. Parameters for the targeted measurement of CGds using UPLC-MS/MS<sup>a</sup>**

| <b>MAN-labeled compounds</b> | <b>Parent<sup>b</sup><br/>m/z</b> | <b>Daughter<br/>m/z</b> | <b>Type of<br/>ion dissociation</b> | <b>CE<br/>(%)</b> |
|------------------------------|-----------------------------------|-------------------------|-------------------------------------|-------------------|
| CG                           | 800.40                            | 366.16                  | CID                                 | 40                |
| Cholesterol                  | 638.40                            | 366.16                  | CID                                 | 30                |
| Lyso-CPG(14:0)               | 1164.62                           | 620.36                  | HCD                                 | 30                |
| Lyso-CPG(18:1)               | 1218.67                           | 620.36                  | HCD                                 | 30                |
| Lyso-CPG(19c:0)              | 1232.70                           | 620.36                  | HCD                                 | 30                |
| CAG(14:0)                    | 1010.62                           | 366.16                  | HCD                                 | 30                |
| CAG(18:1)                    | 1064.67                           | 366.16                  | HCD                                 | 30                |
| CAG(19c:0)                   | 1078.68                           | 366.16                  | HCD                                 | 30                |
| CAG(16:0)                    | 1038.65                           | 366.16                  | HCD                                 | 30                |
| CAG(18:0)                    | 1066.68                           | 366.16                  | HCD                                 | 30                |
| CAG(18:2)                    | 1062.65                           | 366.16                  | HCD                                 | 30                |
| CAG(20:4)                    | 1086.65                           | 366.16                  | HCD                                 | 30                |
| CPG(14:0/14:0)               | 1374.82                           | 620.36                  | HCD                                 | 30                |
| CPG(14:0/18:1)               | 1428.87                           | 620.36                  | HCD                                 | 30                |
| CPG(14:0/19c:0)              | 1442.90                           | 620.36                  | HCD                                 | 30                |
| CPG(19c:0/18:1)              | 1494.93                           | 620.36                  | HCD                                 | 30                |
| CPG(19c:0/19c:0)             | 1510.95                           | 620.36                  | HCD                                 | 30                |
| CPG(14:0/16:0)               | 1402.85                           | 620.36                  | HCD                                 | 30                |
| CPG(16:0/18:1)               | 1456.90                           | 620.36                  | HCD                                 | 30                |
| CPG(16:0/19c:0)              | 1470.92                           | 620.36                  | HCD                                 | 30                |
| CPG(18:1/18:1)               | 1482.92                           | 620.36                  | HCD                                 | 30                |
| CPG(18:0/18:0)               | 1486.95                           | 620.36                  | HCD                                 | 30                |

<sup>a</sup> This table provides a summary of the MS transitions and collision mode/energy of MAN-labeled CGds analyzed by UPLC-MS/MS. Figure S5 shows the detailed data. CE: collision energy, CID: collision-induced dissociation, HCD: higher-energy collisional dissociation, <sup>b</sup>: Isolation width for parent Ion was set to 2.0 Th

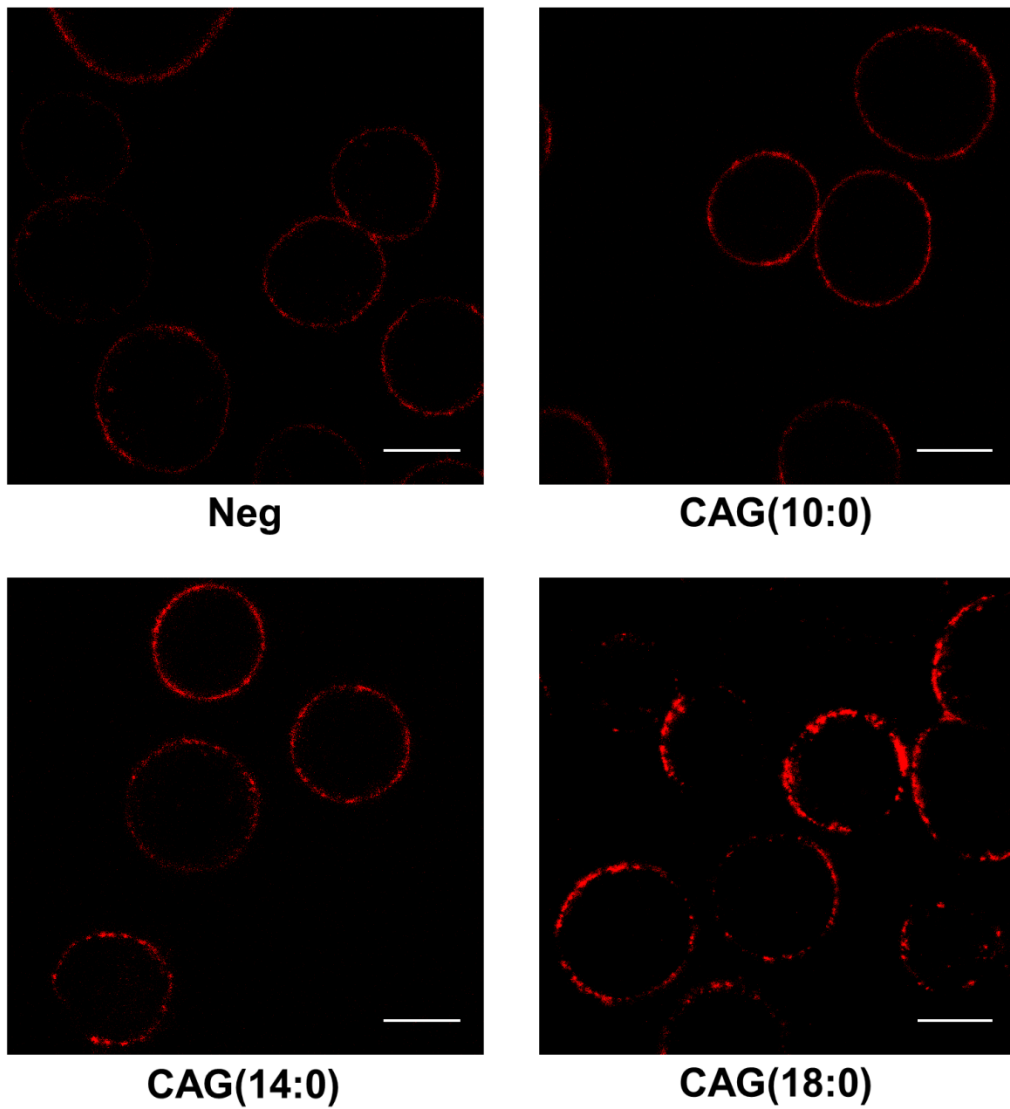

**Supplementary movies.** Movies of AGS cells that were treated with CAGs ((**10:0**), (**14:0**) or (**18:0**)). Lipid rafts (GM1) in AGS cells were first labelled with Alexa Fluor 594-conjugated cholera toxin subunit  $\beta$ , followed by the treatment with indicated CAGs (10:0, 14:0 or 18:0) at 37 °C. Time-lapse images were collected under a Zeiss LSM 510 confocal microscope at 0, 5, 10, 15, 20, 25, 30 and 35 min. The figures shown in here represented the images that collected at 35 min. Scale bars, 10  $\mu$ m.

1. H. Q. Nguyen, R. A. Davis and J. Gervay-Hague, *Angew. Chem., Int. Ed.*, 2014, **53**, 13400-13403.
2. H. J. Wang, W. C. Cheng, H. H. Cheng, C. H. Lai and W. C. Wang, *Mol. Microbiol.*, 2012, **83**, 67-84.
3. P. Gonzalo, B. Sontag, D. Guillot and J. P. Reboud, *Anal. Biochem.*, 1995, **225**, 178-180.
4. H. Lee, P. Wang, H. Hoshino, Y. Ito, M. Kobayashi, J. Nakayama, P. H. Seeberger and M. Fukuda, *Glycobiology*, 2008, **18**, 549-558.
5. X. Zhou and G. Arthur, *J. Lipid Res.*, 1992, **33**, 1233-1236.
6. H. Kuge, K. Akahori, K. Yagyu and K. Honke, *J. Biol. Chem.*, 2014, **289**, 26783-26793.
7. M. K. Mishra, T. Kumaraguru, G. Sheelu and N. W. Fadnavis, *Tetrahedron-Asymmetry*, 2009, **20**, 2854-2860.
8. J. Lessig, J. Schiller, J. Arnhold and B. Fuchs, *J. Lipid Res.*, 2007, **48**, 1316-1324.
9. A. H. Lebrun, C. Wunder, J. Hildebrand, Y. Churin, U. Zahringer, B. Lindner, T. F. Meyer, E. Heinz and D. Warnecke, *J. Biol. Chem.*, 2006, **281**, 27765-27772.
